# Supplementary material for: Ancient genomes of Sitka black-tailed deer show evidence for postglacial stepping-stone dispersal along the Pacific Northwest Coast of North America
Source: Research Square preprint supplement (doi:10.21203/rs.3.rs-5033480/v1), 2024-10-07
Supplement: Supplementary file 1 [file 238202ad9a0063523651a19c.xlsx]

## Sheet: Table S1
													Nuclear Mapping Statistics				Mitochondrial Mapping Statistics
Genetic ID (nuclear)	Mithocondrial haplotype	Morphological ID	Sample ID	Field Number #	Location	Cave	Element	Date (14C)	±	Calibrated date BP (median)	Calibrated (min)	Calibrated (max)	Depth	Breadth	Mapped reads before PCR	Mapped reads after PCR	Width	Breadth	Mapped reads before PCR	Mapped reads after PCR
	Mule deer	Deer/Caribou	SEAK1	CL-00001	SE Alaska		metapodial fragment	8220	125	9192	8778	9521					181.236	0.983765	77551	25169
	Mule deer	Deer/Caribou	SEAK2	CL-00002	SE Alaska		shaft fragments	8220	125	9192	8778	9521					9.46226	0.982452	19272	1838
Sitka black-tailed deer	Mule deer	Deer	SEAK3	NC-00001	SE Alaska	Nautilus	humerus	8180	70	9141	8994	9404	0.62	0.43	29659384	25946266	371.625	0.983765	5346840	58672
Sitka black-tailed deer	Mule deer	Deer	SEAK4	ZI-00001	SE Alaska	Tiacatzinacantli	femur	7850	90	8680	8453	8985	1.04274	0.600207	50816685	43798928	432.838	0.983765	5217106	60863
Sitka black-tailed deer	Mule deer	Deer	SEAK5	ZI-00005	SE Alaska	Tiacatzinacantli	Metatarsal	7630	120	8433	8174	8717	0.0843905	0.0788395	12931759	2932636	254.22	0.98	22467388	32629
Sitka black-tailed deer	Sitka black-tailed deer	Deer	SEAK6	ZI-00004	SE Alaska	Tiacatzinacantli	Metacarpal	5235	75	6019	5763	6266	0.137357	0.124983	9435952	5076052	271.784	0.999575	18563234	31851
Sitka black-tailed deer	Sitka black-tailed deer	Deer	SEAK7	OK-00131	SE Alaska	On Your Knees	Ilium	5210	60	5979	5762	6185	0.13	0.118	6005911	4904247	0.99	178.821	22079796	30201
Sitka black-tailed deer	Sitka black-tailed deer	Deer	SEAK8	CO-00005	SE Alaska	Colander	Complete, left humerus	3310	52	3531	3405	3687	0.0278697	0.124983	5520471	1141427	194.2	1	25579249	29728
Ancient black-tailed deer	Columbian Black-tailed deer	Deer	NVI-1		Vancouver Island	Burnt Toast	Thoracic vertebra 1860+/-30	1860	30	1771	1707	1864	0.19	0.17	6629045	5668447	91.2013	0.99	37361	18024
Ancient black-tailed deer	Columbian Black-tailed deer	Deer	NVI-2		Vancouver Island	Gaping Maw	Thoracic vertebra	1040	40	946	800	1057	0.54	0.39	29494263	24643832	29.4569	0.99909	16742	9336
Ancient black-tailed deer	Columbian Black-tailed deer	Deer	NVI-4		Vancouver Island	Haphazard	R. tibia	965	30	853	792	926	0.11	0.098	3606244	3105335	13.3386	0.996481	3979	3272
Ancient black-tailed deer	Columbian Black-tailed deer	Deer	NVI-5		Vancouver Island	Hot Dignity	L. metatarsal	4035	40	5525	5468	5588	1.5	0.71	62804432	53156136	132.643	0.999575	85476	25414
Ancient black-tailed deer	Columbian Black-tailed deer	Deer	NVI-6		Vancouver Island	Klaskish WP877	R. mandible	4035	40	4500	4415	4789	0.019	0.018	1102596	958266	13.5077	0.99	5301	4200
Ancient black-tailed deer	Columbian Black-tailed deer	Deer	NVI-7		Vancouver Island	Kya-wah-yew	L. femur	11695	70	13553	13427	13755	0.2	0.17	7780603	6482351	102.263	1	49443	21225
Ancient black-tailed deer	Columbian Black-tailed deer	Deer	NVI-8		Vancouver Island	Papua	R. mandible	2670	30	2773	2743	2848	0.08	0.075	3342870	2788588	65.9325	1	24994	14507
Ancient black-tailed deer	Columbian Black-tailed deer	Deer	NVI-9		Vancouver Island	Reconnaissance	R. humerus	1070	50	981	805	1175	0.65	0.45	20812001	17613437	201.816	0.999575	145167	29864
Ancient black-tailed deer	Columbian Black-tailed deer	Deer	NVI-10		Vancouver Island	Sparkle	1 L scapula	9265	50	10438	10264	10574	0.017	0.016	712279	603125	42.437	0.999272	14475	9677
	Black-tailed deer	Deer	NVI11	KWY-b	Vancouver Island	Kya-wah-yew		Between 10495±60 and 12225±35(Median 11360)		13239	13125	13324					59.9927	1	17824073	14913
	Black-tailed deer	Ungulate	HG1	GD1-8A9	Haida Gwaii	Gaadu Din 1 Cave		10990	25	12892	12826	13061					64.9924	1	16604482	16493
	Black-tailed deer	Ungulate	HG2	GD1-8A2	Haida Gwaii	Gaadu Din 1 Cave		10935	40	12830	12752	12956					95.6151	0.999	20028240	23039
	Black-tailed deer	Deer	HG3	K1-AB6a	Haida Gwaii	K1 Cave		10905	35	12804	12751	12890					64.9924	1	16604482	16493

## Sheet: Table S2
Species	Sample ID	Field ID	Mithocondrial haplotype	Geographic locality	Reference	Mitogenome Depth/Width	Nuclear Depth/Width	Reads before PCR duplicate removal	Reads before PCR duplicate removal	Biosample (NCBI)	Genbank Acession number
O. h. sitkensis	SBTD1	367	O. h. sitkensis	Admiralty Island, SEAK	This study	12764/1	6.61/0.87	123524399	106026733
O. h. hemionus	MD1	1036	O. h. columbianus	Mexico	This study	8513/1	6.10/0.86	112913982	98065230
O. h. columbianus	CBTD_BC1	1467	O. h. columbianus	Vancouver Island, BC	This study	2104/1	8.51/0.87	156451451	137084970
O. h. hemionus	MD3	5238	O. h. columbianus	Idaho	This study	6262/1	9.96/0.87	182344783	160260873
O. h. hemionus	MD4	5287	O. h. hemionus	Montana	This study	3917/1	8.24/0.87	157104565	132515042
O. h. columbianus	CBTD_BC3	5682	O. h. columbianus	British Columbia	This study	10555/1	6.27/0.86	109682129	100702296
O. h. hemionus	MD5	5692	O. h. hemionus	British Columbia	This study	11114/1	6.58/0.86	120410208	105762831
O. h. columbianus	CBTD2	5813	O. h. columbianus	Oregon	This study	651/1	7.21/0.87	127001029	116007306
O. h. hemionus	MD6	6215	O. h. hemionus	Alberta	This study	9599/1	6.86/0.86	122945373	110261365
O. h. columbianus	CBTD4	8016	O. h. columbianus	Oregon	This study	5493/1	7.47/0.87	138553543	120138900
O. h. hemionus	MD7	9512	O. h. hemionus	Arizona	This study	8657/1	3.76/0.76	85476234	60674181
O. h. sitkensis	SBTD2	99238	O. h. sitkensis	Kodiak Island, AK	This study	13483/1	6.95/0.86	128701816	111611538
O. h. hemionus	MD8	99536	O. h. hemionus	Oregon	This study	2566/1	8.94/0.94	160356195	143642340
O. h. sitkensis	SBTD3	AK1	O. h. sitkensis	Admiralty Island, SEAK	Kessler et al 2022	2912/1	4.58/0.86	84956916	73681843	SAMN27729478
O. virginianus	WTD1	AL3	O. virginianus	Alabama	Kessler et al 2022	4326/1	4.26/0.86	82417614	68471925	SAMN27729492
O. h. columbianus	CBTD_BC2	BC1	O. h. columbianus	Vancouver Island, BC	Kessler et al 2022	1185/1	4.51/0.85	83591416	72540591	SAMN27729479
O. h. hemionus	MD9	BC6	O. h. hemionus	British Columbia	Kessler et al 2022	2622/1	5.31/0.87	97559193	85489593	SAMN27729480
O. h. columbianus	CBTD5	BC8	O. h. columbianus	British Columbia	Kessler et al 2022	8358/1	4.11/0.85	75302709	66152778	SAMN27729481
O. h. sitkensis	SBTD4	BTD	O. h. sitkensis	Haida Gwaii, BC	GCA_003697985.1	6871/1	18.65/0.88	462111551	360685277	SAMN09430949
O. h. hemionus	MD10	CA3	O. h. hemionus	California	Kessler et al 2022	4397/1	5.17/0.86	100234111	83037509	SAMN27729483
O. h. hemionus	MD17	CO1	O. h. hemionus	Colorado	Kessler et al 2022	292/1	5.40/0.86	105172808	86665405	SAMN27729483
O. virginianus	WTD2	KS1	O. virginianus	Kansas	Kessler et al 2022	19125/1	6.27/0.87	116776285	100583083	SAMN27729492
O. h. hemionus	MD14	MD_AB1	O. h. hemionus	Alberta	Kessler et al 2022	883/1	5.5/0.87	106476059	88389678	SAMN27729477
O. h. sitkensis	SBTD5	ModernBTD	O. h. sitkensis	Southeast Alaska	This study
O. virginianus	WTD3	MT1	O. virginianus	Montana	Kessler et al 2022	7950/1	4.83/0.87	86295793	77883009	SAMN27729494
O. virginianus	WTD4	MX2	O. virginianus	Mexico	Kessler et al 2022	10066/1	4.87/0.86	95276491	78284107	SAMN27729495
O. h. hemionus	MD11	NM2	O. h. hemionus	New Mexico	Kessler et al 2022	13632/1	18.36/0.86	292865482	37613340	SAMN27729484
O. h. hemionus	MD12	NV2	O. h. hemionus	Nevada	Kessler et al 2022	3054/1	5.11/0.86	98602087	82014974	SAMN27729485
O. virginianus	WTD5	Odo	O. virginianus	Vermont	GCA_014726795.1	37356/1	45.8151/0.88	863679840	750667295	SAMN08105892
O. h. hemionus	MD13	Ohem	O. h. hemionus	Utah	Lamb et al 2021		6.76/0.87	127271143	108209651	SAMN20587837
O. virginianus	WTD6	ON3	O. virginianus	Ontario	Kessler et al 2022	462/1	5.82/0.87	114577126	93358119	SAMN27729496
O. virginianus	WTD7	ON5	O. virginianus	Ontario	Kessler et al 2022	1172/1	5.84/0.87	111073141	93641334	SAMN27729497
O. virginianus	WTD8	ON6	O. virginianus	Ontario	Kessler et al 2022	26881/1	19.57/0.86	382065550	311796084	SAMN27729498
O. h. columbianus	CBTD3	OR2	O. h. columbianus	Oregon	Kessler et al 2022	276/0.99	4.96/0.86	97946350	79770067	SAMN27729486
O. virginianus	WTD9	Ovir	O. virginianus	Texas	GCF_002102435.1	4485/1	61.19/0.90		1624266307	SAMN05363940
O. virginianus	WTD10	PA3	O. virginianus	Pensylvannia	Kessler et al 2022	878/1	3.46/0.84	66591435	55385576	SAMN27729499
O. virginianus	WTD11	SC1	O. virginianus	South Carolina	Kessler et al 2022	5600/1	5.72/0.87	111047401	92044300	SAMN27729500
O. virginianus	WTD12	SD1	O. virginianus	South Dakota	Kessler et al 2022	2375/1	3.29/0.83	60233472	52797359	SAMN27729501
O. h. hemionus	MD2	SD2	O. h. hemionus	South Dakota	Kessler et al 2022	2381/1	3.32/0.84	60725076	53211670	SAMN27729487
O. virginianus	WTD13	SK2	O. virginianus	Saskatchewan	Kessler et al 2022	7464/1	6.98/0.87	135864425	111776548	SAMN27729502
O. virginianus	WTD14	SK3	O. virginianus	Saskatchewan	Kessler et al 2022	10175/1	6.76/0.87	127271143	108209651	SAMN32798417
O. h. hemionus	MD16	SK5	O. h. hemionus	Saskatchewan	Kessler et al 2022	1055/1	4.28/0.85	82878760	68683383	SAMN27729488
O. h. hemionus	MD15	UT2	O. h. hemionus	Utah	Kessler et al 2022	965/1	3.08/0.81	58085630	50508595	SAMN27729489
O. virginianus	WTD15	VA3	O. virginianus	Virginia	Kessler et al 2022	2429/1	5.64/0.87	102693599	58085630	SAMN27729504
O. h. columbianus	CBTD1	WA1	O. h. columbianus	Washigton	Kessler et al 2022	18173/1	20.26/0.88	409286478	326268238	SAMN27729490
O. virginianus	WTD16	WTD_AB1	O. virginianus	Alberta	Kessler et al 2022	1129/1	6.45/0.87	125028407	103385300	SAMN27729491

## Sheet: Table S3
Dataset	Samples included	SNPs
DS1	all modern and only ancient samples with a coverage depth above 0.5x	45179589
DS2	ancient and modern O. hemionus	848944
DS3	modern samples	264800

## Sheet: Table S4
GO	NS	enrichment	name	ratio_in_study	ratio_in_pop	p_uncorrected	depth	study_count	p_bonferroni	p_sidak	p_holm	p_fdr_bh	study_items
GO:0008150	BP	e	biological_process	146/170	146/28017	0	0	146	0	0	0	0	Odocoileus_000052, Odocoileus_000127, Odocoileus_000175, Odocoileus_000178, Odocoileus_000179, Odocoileus_000206, Odocoileus_000218, Odocoileus_000376, Odocoileus_000381, Odocoileus_000384, Odocoileus_000455, Odocoileus_000470, Odocoileus_000569, Odocoileus_000987, Odocoileus_001081, Odocoileus_001176, Odocoileus_001215, Odocoileus_001225, Odocoileus_001290, Odocoileus_001768, Odocoileus_002255, …
GO:0009987	BP	e	cellular process	103/170	103/28017	1.97666e-246	1	103	2.18816e-243	2.13304e-243	2.18619e-243	1.09408e-243	Odocoileus_000052, Odocoileus_000175, Odocoileus_000178, Odocoileus_000381, Odocoileus_000384, Odocoileus_000455, Odocoileus_000569, Odocoileus_000987, Odocoileus_001081, Odocoileus_001176, Odocoileus_001768, Odocoileus_002255, Odocoileus_002350, Odocoileus_002352, Odocoileus_002715, Odocoileus_003128, Odocoileus_003225, Odocoileus_003349, Odocoileus_005251, Odocoileus_005581, Odocoileus_005834, …
GO:0065007	BP	e	biological regulation	85/170	85/28017	2.72606e-200	1	85	3.01775e-197	2.94173e-197	3.01229e-197	1.00592e-197	Odocoileus_000178, Odocoileus_000179, Odocoileus_000206, Odocoileus_000218, Odocoileus_000376, Odocoileus_000381, Odocoileus_000384, Odocoileus_000455, Odocoileus_000470, Odocoileus_000987, Odocoileus_001081, Odocoileus_001176, Odocoileus_001215, Odocoileus_001225, Odocoileus_002255, Odocoileus_002352, Odocoileus_002715, Odocoileus_003128, Odocoileus_003225, Odocoileus_003349, Odocoileus_003624, …
GO:0050789	BP	e	regulation of biological process	80/170	80/28017	8.79317e-188	2	80	9.73404e-185	9.48883e-185	9.70766e-185	2.43351e-185	Odocoileus_000178, Odocoileus_000179, Odocoileus_000206, Odocoileus_000218, Odocoileus_000376, Odocoileus_000381, Odocoileus_000384, Odocoileus_000455, Odocoileus_000470, Odocoileus_000987, Odocoileus_001081, Odocoileus_001176, Odocoileus_001225, Odocoileus_002255, Odocoileus_002352, Odocoileus_002715, Odocoileus_003128, Odocoileus_003225, Odocoileus_003349, Odocoileus_003768, Odocoileus_005550, …
GO:0050794	BP	e	regulation of cellular process	75/170	75/28017	2.15335e-175	3	75	2.38376e-172	2.32371e-172	2.37514e-172	4.76751e-173	Odocoileus_000178, Odocoileus_000179, Odocoileus_000206, Odocoileus_000218, Odocoileus_000376, Odocoileus_000381, Odocoileus_000384, Odocoileus_000455, Odocoileus_000470, Odocoileus_000987, Odocoileus_001081, Odocoileus_001176, Odocoileus_001225, Odocoileus_002255, Odocoileus_002352, Odocoileus_002715, Odocoileus_003128, Odocoileus_003225, Odocoileus_003349, Odocoileus_003768, Odocoileus_005550, …
GO:0008152	BP	e	metabolic process	57/170	57/28017	1.08136e-131	1	57	1.19706e-128	1.1669e-128	1.19165e-128	1.9951e-129	Odocoileus_000052, Odocoileus_000381, Odocoileus_000569, Odocoileus_001768, Odocoileus_002286, Odocoileus_002350, Odocoileus_002352, Odocoileus_003128, Odocoileus_003253, Odocoileus_006245, Odocoileus_006382, Odocoileus_006488, Odocoileus_007342, Odocoileus_007513, Odocoileus_007894, Odocoileus_008298, Odocoileus_008665, Odocoileus_009014, Odocoileus_009101, Odocoileus_009263, Odocoileus_010192, …
GO:0071704	BP	e	organic substance metabolic process	54/170	54/28017	1.55458e-124	2	54	1.72092e-121	1.67757e-121	1.71159e-121	2.45845e-122	Odocoileus_000052, Odocoileus_000381, Odocoileus_000569, Odocoileus_001768, Odocoileus_002286, Odocoileus_002350, Odocoileus_002352, Odocoileus_003128, Odocoileus_006245, Odocoileus_006382, Odocoileus_006488, Odocoileus_007342, Odocoileus_007513, Odocoileus_007894, Odocoileus_008298, Odocoileus_008665, Odocoileus_009014, Odocoileus_009101, Odocoileus_009263, Odocoileus_010192, Odocoileus_010267, …
GO:0044238	BP	e	primary metabolic process	52/170	52/28017	8.80559e-120	2	52	9.74779e-117	9.50223e-117	9.68615e-117	1.21847e-117	Odocoileus_000052, Odocoileus_000381, Odocoileus_000569, Odocoileus_001768, Odocoileus_002286, Odocoileus_002350, Odocoileus_002352, Odocoileus_003128, Odocoileus_003253, Odocoileus_006245, Odocoileus_006382, Odocoileus_006488, Odocoileus_007513, Odocoileus_007894, Odocoileus_008298, Odocoileus_008665, Odocoileus_009014, Odocoileus_009101, Odocoileus_009263, Odocoileus_010192, Odocoileus_010267, …
GO:0006807	BP	e	nitrogen compound metabolic process	49/170	49/28017	1.11476e-112	2	49	1.23404e-109	1.20296e-109	1.22513e-109	1.37116e-110	Odocoileus_000052, Odocoileus_000381, Odocoileus_000569, Odocoileus_001768, Odocoileus_002286, Odocoileus_002350, Odocoileus_002352, Odocoileus_003128, Odocoileus_006245, Odocoileus_006382, Odocoileus_006488, Odocoileus_007342, Odocoileus_007513, Odocoileus_007894, Odocoileus_008665, Odocoileus_009014, Odocoileus_009263, Odocoileus_010192, Odocoileus_010267, Odocoileus_010625, Odocoileus_010730, …
GO:0044237	BP	e	cellular metabolic process	43/170	43/28017	1.43452e-98	2	43	1.58801e-95	1.54801e-95	1.5751e-95	1.58801e-96	Odocoileus_000569, Odocoileus_001768, Odocoileus_002350, Odocoileus_002352, Odocoileus_003128, Odocoileus_006245, Odocoileus_006382, Odocoileus_006488, Odocoileus_007342, Odocoileus_007513, Odocoileus_008298, Odocoileus_008665, Odocoileus_009014, Odocoileus_009263, Odocoileus_010192, Odocoileus_010267, Odocoileus_010625, Odocoileus_010730, Odocoileus_010732, Odocoileus_010891, Odocoileus_012356, …
GO:0043170	BP	e	macromolecule metabolic process	41/170	41/28017	6.79927e-94	3	41	7.52679e-91	7.33719e-91	7.4588e-91	6.84254e-92	Odocoileus_000052, Odocoileus_000381, Odocoileus_000569, Odocoileus_001768, Odocoileus_002286, Odocoileus_002350, Odocoileus_002352, Odocoileus_003128, Odocoileus_006245, Odocoileus_006382, Odocoileus_006488, Odocoileus_007513, Odocoileus_007894, Odocoileus_008665, Odocoileus_009014, Odocoileus_009263, Odocoileus_010192, Odocoileus_010625, Odocoileus_010730, Odocoileus_010732, Odocoileus_010891, …
GO:0007165	BP	e	signal transduction	39/170	39/28017	3.12511e-89	4	39	3.4595e-86	3.37235e-86	3.42512e-86	2.66115e-87	Odocoileus_001081, Odocoileus_001176, Odocoileus_002255, Odocoileus_002352, Odocoileus_002715, Odocoileus_003225, Odocoileus_003349, Odocoileus_006245, Odocoileus_006247, Odocoileus_006264, Odocoileus_006265, Odocoileus_006296, Odocoileus_006475, Odocoileus_006488, Odocoileus_006917, Odocoileus_007245, Odocoileus_007513, Odocoileus_009014, Odocoileus_009101, Odocoileus_009263, Odocoileus_010192, …
GO:1901564	BP	e	organonitrogen compound metabolic process	39/170	39/28017	3.12511e-89	3	39	3.4595e-86	3.37235e-86	3.42512e-86	2.66115e-87	Odocoileus_000052, Odocoileus_000381, Odocoileus_002286, Odocoileus_006245, Odocoileus_006488, Odocoileus_007342, Odocoileus_007513, Odocoileus_007894, Odocoileus_009014, Odocoileus_009263, Odocoileus_010267, Odocoileus_010625, Odocoileus_010732, Odocoileus_010891, Odocoileus_010944, Odocoileus_011924, Odocoileus_012356, Odocoileus_012450, Odocoileus_012471, Odocoileus_013866, Odocoileus_013880, …
GO:0019222	BP	e	regulation of metabolic process	34/170	34/28017	1.24102e-77	3	34	1.37381e-74	1.3392e-74	1.35768e-74	9.81292e-76	Odocoileus_000178, Odocoileus_000179, Odocoileus_000206, Odocoileus_000218, Odocoileus_000376, Odocoileus_000381, Odocoileus_000384, Odocoileus_000470, Odocoileus_000987, Odocoileus_003128, Odocoileus_003225, Odocoileus_003768, Odocoileus_005550, Odocoileus_005952, Odocoileus_005953, Odocoileus_005955, Odocoileus_006138, Odocoileus_006245, Odocoileus_006382, Odocoileus_006488, Odocoileus_008608, …
GO:0031323	BP	e	regulation of cellular metabolic process	33/170	33/28017	2.53494e-75	4	33	2.80618e-72	2.73549e-72	2.77069e-72	1.87079e-73	Odocoileus_000178, Odocoileus_000179, Odocoileus_000206, Odocoileus_000218, Odocoileus_000376, Odocoileus_000381, Odocoileus_000384, Odocoileus_000470, Odocoileus_000987, Odocoileus_003128, Odocoileus_003225, Odocoileus_003768, Odocoileus_005550, Odocoileus_005952, Odocoileus_005953, Odocoileus_005955, Odocoileus_006138, Odocoileus_006245, Odocoileus_006382, Odocoileus_006488, Odocoileus_008608, …
GO:0060255	BP	e	regulation of macromolecule metabolic process	30/170	30/28017	2.06904e-68	4	30	2.29042e-65	2.23273e-65	2.25939e-65	1.43152e-66	Odocoileus_000178, Odocoileus_000179, Odocoileus_000206, Odocoileus_000218, Odocoileus_000376, Odocoileus_000470, Odocoileus_000987, Odocoileus_003128, Odocoileus_003225, Odocoileus_003768, Odocoileus_005550, Odocoileus_005952, Odocoileus_005953, Odocoileus_005955, Odocoileus_006138, Odocoileus_006245, Odocoileus_006382, Odocoileus_008608, Odocoileus_009263, Odocoileus_010192, Odocoileus_010625, …
GO:0031326	BP	e	regulation of cellular biosynthetic process	29/170	29/28017	4.10697e-66	5	29	4.54641e-63	4.43188e-63	4.4807e-63	2.27321e-64	Odocoileus_000178, Odocoileus_000179, Odocoileus_000206, Odocoileus_000218, Odocoileus_000376, Odocoileus_000470, Odocoileus_000987, Odocoileus_003128, Odocoileus_003225, Odocoileus_003768, Odocoileus_005550, Odocoileus_005952, Odocoileus_005953, Odocoileus_005955, Odocoileus_006138, Odocoileus_006245, Odocoileus_006382, Odocoileus_008608, Odocoileus_009263, Odocoileus_010192, Odocoileus_010625, …
GO:0010556	BP	e	regulation of macromolecule biosynthetic process	29/170	29/28017	4.10697e-66	6	29	4.54641e-63	4.43188e-63	4.4807e-63	2.27321e-64	Odocoileus_000178, Odocoileus_000179, Odocoileus_000206, Odocoileus_000218, Odocoileus_000376, Odocoileus_000470, Odocoileus_000987, Odocoileus_003128, Odocoileus_003225, Odocoileus_003768, Odocoileus_005550, Odocoileus_005952, Odocoileus_005953, Odocoileus_005955, Odocoileus_006138, Odocoileus_006245, Odocoileus_006382, Odocoileus_008608, Odocoileus_009263, Odocoileus_010192, Odocoileus_010625, …
GO:0080090	BP	e	regulation of primary metabolic process	29/170	29/28017	4.10697e-66	4	29	4.54641e-63	4.43188e-63	4.4807e-63	2.27321e-64	Odocoileus_000178, Odocoileus_000179, Odocoileus_000206, Odocoileus_000218, Odocoileus_000376, Odocoileus_000470, Odocoileus_000987, Odocoileus_003225, Odocoileus_003768, Odocoileus_005550, Odocoileus_005952, Odocoileus_005953, Odocoileus_005955, Odocoileus_006138, Odocoileus_006245, Odocoileus_006382, Odocoileus_008608, Odocoileus_009263, Odocoileus_010192, Odocoileus_010625, Odocoileus_010732, …
GO:0009889	BP	e	regulation of biosynthetic process	29/170	29/28017	4.10697e-66	4	29	4.54641e-63	4.43188e-63	4.4807e-63	2.27321e-64	Odocoileus_000178, Odocoileus_000179, Odocoileus_000206, Odocoileus_000218, Odocoileus_000376, Odocoileus_000470, Odocoileus_000987, Odocoileus_003128, Odocoileus_003225, Odocoileus_003768, Odocoileus_005550, Odocoileus_005952, Odocoileus_005953, Odocoileus_005955, Odocoileus_006138, Odocoileus_006245, Odocoileus_006382, Odocoileus_008608, Odocoileus_009263, Odocoileus_010192, Odocoileus_010625, …
GO:0051171	BP	e	regulation of nitrogen compound metabolic process	28/170	28/28017	8.09506e-64	4	28	8.96123e-61	8.73549e-61	8.79933e-61	4.07329e-62	Odocoileus_000178, Odocoileus_000179, Odocoileus_000206, Odocoileus_000218, Odocoileus_000376, Odocoileus_000987, Odocoileus_003225, Odocoileus_003768, Odocoileus_005550, Odocoileus_005952, Odocoileus_005953, Odocoileus_005955, Odocoileus_006138, Odocoileus_006245, Odocoileus_006382, Odocoileus_008608, Odocoileus_009263, Odocoileus_010192, Odocoileus_010625, Odocoileus_010732, Odocoileus_012472, …
GO:0010468	BP	e	regulation of gene expression	28/170	28/28017	8.09506e-64	7	28	8.96123e-61	8.73549e-61	8.79933e-61	4.07329e-62	Odocoileus_000178, Odocoileus_000179, Odocoileus_000206, Odocoileus_000218, Odocoileus_000376, Odocoileus_000987, Odocoileus_003128, Odocoileus_003225, Odocoileus_003768, Odocoileus_005550, Odocoileus_005952, Odocoileus_005953, Odocoileus_005955, Odocoileus_006138, Odocoileus_006245, Odocoileus_006382, Odocoileus_008608, Odocoileus_009263, Odocoileus_010192, Odocoileus_010625, Odocoileus_012472, …
GO:0019538	BP	e	protein metabolic process	27/170	27/28017	1.58448e-61	4	27	1.75402e-58	1.70983e-58	1.71916e-58	7.62618e-60	Odocoileus_000052, Odocoileus_000381, Odocoileus_002286, Odocoileus_006245, Odocoileus_006488, Odocoileus_007894, Odocoileus_009014, Odocoileus_009263, Odocoileus_010625, Odocoileus_010732, Odocoileus_010891, Odocoileus_011924, Odocoileus_012471, Odocoileus_013866, Odocoileus_013880, Odocoileus_014765, Odocoileus_019619, Odocoileus_019661, Odocoileus_020256, Odocoileus_020528, Odocoileus_021592, …
GO:0051252	BP	e	regulation of RNA metabolic process	25/170	25/28017	5.94578e-57	6	25	6.58198e-54	6.41617e-54	6.44523e-54	2.43777e-55	Odocoileus_000179, Odocoileus_000206, Odocoileus_000218, Odocoileus_000376, Odocoileus_000987, Odocoileus_003225, Odocoileus_003768, Odocoileus_005550, Odocoileus_005952, Odocoileus_005953, Odocoileus_005955, Odocoileus_006138, Odocoileus_006245, Odocoileus_006382, Odocoileus_008608, Odocoileus_009263, Odocoileus_010625, Odocoileus_012472, Odocoileus_013631, Odocoileus_019161, Odocoileus_019424, …
GO:2001141	BP	e	regulation of RNA biosynthetic process	25/170	25/28017	5.94578e-57	7	25	6.58198e-54	6.41617e-54	6.44523e-54	2.43777e-55	Odocoileus_000179, Odocoileus_000206, Odocoileus_000218, Odocoileus_000376, Odocoileus_000987, Odocoileus_003225, Odocoileus_003768, Odocoileus_005550, Odocoileus_005952, Odocoileus_005953, Odocoileus_005955, Odocoileus_006138, Odocoileus_006245, Odocoileus_006382, Odocoileus_008608, Odocoileus_009263, Odocoileus_010625, Odocoileus_012472, Odocoileus_013631, Odocoileus_019161, Odocoileus_019424, …
GO:0019219	BP	e	regulation of nucleobase-containing compound metabolic process	25/170	25/28017	5.94578e-57	5	25	6.58198e-54	6.41617e-54	6.44523e-54	2.43777e-55	Odocoileus_000179, Odocoileus_000206, Odocoileus_000218, Odocoileus_000376, Odocoileus_000987, Odocoileus_003225, Odocoileus_003768, Odocoileus_005550, Odocoileus_005952, Odocoileus_005953, Odocoileus_005955, Odocoileus_006138, Odocoileus_006245, Odocoileus_006382, Odocoileus_008608, Odocoileus_009263, Odocoileus_010625, Odocoileus_012472, Odocoileus_013631, Odocoileus_019161, Odocoileus_019424, …
GO:0006355	BP	e	regulation of DNA-templated transcription	25/170	25/28017	5.94578e-57	8	25	6.58198e-54	6.41617e-54	6.44523e-54	2.43777e-55	Odocoileus_000179, Odocoileus_000206, Odocoileus_000218, Odocoileus_000376, Odocoileus_000987, Odocoileus_003225, Odocoileus_003768, Odocoileus_005550, Odocoileus_005952, Odocoileus_005953, Odocoileus_005955, Odocoileus_006138, Odocoileus_006245, Odocoileus_006382, Odocoileus_008608, Odocoileus_009263, Odocoileus_010625, Odocoileus_012472, Odocoileus_013631, Odocoileus_019161, Odocoileus_019424, …
GO:0071840	BP	e	cellular component organization or biogenesis	24/170	24/28017	1.14e-54	2	24	1.26198e-51	1.23019e-51	1.2312e-51	4.35166e-53	Odocoileus_000052, Odocoileus_000175, Odocoileus_000178, Odocoileus_000381, Odocoileus_000569, Odocoileus_000987, Odocoileus_001176, Odocoileus_002255, Odocoileus_006245, Odocoileus_007509, Odocoileus_008154, Odocoileus_009014, Odocoileus_010525, Odocoileus_010625, Odocoileus_010732, Odocoileus_010804, Odocoileus_019619, Odocoileus_019829, Odocoileus_020310, Odocoileus_020767, Odocoileus_021041, …
GO:0016043	BP	e	cellular component organization	24/170	24/28017	1.14e-54	3	24	1.26198e-51	1.23019e-51	1.2312e-51	4.35166e-53	Odocoileus_000052, Odocoileus_000175, Odocoileus_000178, Odocoileus_000381, Odocoileus_000569, Odocoileus_000987, Odocoileus_001176, Odocoileus_002255, Odocoileus_006245, Odocoileus_007509, Odocoileus_008154, Odocoileus_009014, Odocoileus_010525, Odocoileus_010625, Odocoileus_010732, Odocoileus_010804, Odocoileus_019619, Odocoileus_019829, Odocoileus_020310, Odocoileus_020767, Odocoileus_021041, …
GO:0034641	BP	e	cellular nitrogen compound metabolic process	22/170	22/28017	4.1065e-50	3	22	4.5459e-47	4.43138e-47	4.42681e-47	1.46642e-48	Odocoileus_000569, Odocoileus_001768, Odocoileus_002350, Odocoileus_002352, Odocoileus_003128, Odocoileus_006245, Odocoileus_006382, Odocoileus_007342, Odocoileus_007513, Odocoileus_008665, Odocoileus_009014, Odocoileus_010192, Odocoileus_010267, Odocoileus_010730, Odocoileus_012356, Odocoileus_021093, Odocoileus_021094, Odocoileus_021337, Odocoileus_021907, Odocoileus_022144, Odocoileus_022329, …
GO:0051179	BP	e	localization	22/170	22/28017	4.1065e-50	1	22	4.5459e-47	4.43138e-47	4.42681e-47	1.46642e-48	Odocoileus_000455, Odocoileus_001176, Odocoileus_005251, Odocoileus_005834, Odocoileus_006245, Odocoileus_007504, Odocoileus_007878, Odocoileus_007907, Odocoileus_008154, Odocoileus_009014, Odocoileus_009263, Odocoileus_010368, Odocoileus_010625, Odocoileus_010702, Odocoileus_010732, Odocoileus_013819, Odocoileus_019441, Odocoileus_020018, Odocoileus_021041, Odocoileus_023460, Odocoileus_025133, …
GO:0043412	BP	e	macromolecule modification	21/170	21/28017	7.71581e-48	4	21	8.5414e-45	8.32624e-45	8.30221e-45	2.51218e-46	Odocoileus_000052, Odocoileus_006245, Odocoileus_006488, Odocoileus_007894, Odocoileus_009014, Odocoileus_009263, Odocoileus_010192, Odocoileus_010625, Odocoileus_010732, Odocoileus_010891, Odocoileus_011924, Odocoileus_012471, Odocoileus_013866, Odocoileus_013880, Odocoileus_014765, Odocoileus_019619, Odocoileus_019661, Odocoileus_020256, Odocoileus_020528, Odocoileus_021592, Odocoileus_022393
GO:0051234	BP	e	establishment of localization	21/170	21/28017	7.71581e-48	2	21	8.5414e-45	8.32624e-45	8.30221e-45	2.51218e-46	Odocoileus_000455, Odocoileus_001176, Odocoileus_005251, Odocoileus_005834, Odocoileus_006245, Odocoileus_007504, Odocoileus_007878, Odocoileus_007907, Odocoileus_008154, Odocoileus_009014, Odocoileus_009263, Odocoileus_010625, Odocoileus_010702, Odocoileus_010732, Odocoileus_013819, Odocoileus_019441, Odocoileus_020018, Odocoileus_021041, Odocoileus_023460, Odocoileus_025133, Odocoileus_025491
GO:0006810	BP	e	transport	21/170	21/28017	7.71581e-48	3	21	8.5414e-45	8.32624e-45	8.30221e-45	2.51218e-46	Odocoileus_000455, Odocoileus_001176, Odocoileus_005251, Odocoileus_005834, Odocoileus_006245, Odocoileus_007504, Odocoileus_007878, Odocoileus_007907, Odocoileus_008154, Odocoileus_009014, Odocoileus_009263, Odocoileus_010625, Odocoileus_010702, Odocoileus_010732, Odocoileus_013819, Odocoileus_019441, Odocoileus_020018, Odocoileus_021041, Odocoileus_023460, Odocoileus_025133, Odocoileus_025491
GO:0006357	BP	e	regulation of transcription by RNA polymerase II	20/170	20/28017	1.44013e-45	9	20	1.59422e-42	1.55406e-42	1.54526e-42	4.55493e-44	Odocoileus_000206, Odocoileus_000218, Odocoileus_000987, Odocoileus_003225, Odocoileus_003768, Odocoileus_005952, Odocoileus_005953, Odocoileus_005955, Odocoileus_006138, Odocoileus_006245, Odocoileus_006382, Odocoileus_008608, Odocoileus_009263, Odocoileus_012472, Odocoileus_013631, Odocoileus_019161, Odocoileus_019424, Odocoileus_020822, Odocoileus_022329, Odocoileus_025827
GO:0046483	BP	e	heterocycle metabolic process	19/170	19/28017	2.67025e-43	3	19	2.95597e-40	2.8815e-40	2.86251e-40	7.5794e-42	Odocoileus_000569, Odocoileus_001768, Odocoileus_002350, Odocoileus_002352, Odocoileus_003128, Odocoileus_006245, Odocoileus_006382, Odocoileus_007342, Odocoileus_007513, Odocoileus_008665, Odocoileus_009014, Odocoileus_010192, Odocoileus_010267, Odocoileus_010730, Odocoileus_021093, Odocoileus_021094, Odocoileus_021337, Odocoileus_022144, Odocoileus_022372
GO:1901360	BP	e	organic cyclic compound metabolic process	19/170	19/28017	2.67025e-43	3	19	2.95597e-40	2.8815e-40	2.86251e-40	7.5794e-42	Odocoileus_000569, Odocoileus_001768, Odocoileus_002350, Odocoileus_002352, Odocoileus_003128, Odocoileus_006245, Odocoileus_006382, Odocoileus_007342, Odocoileus_007513, Odocoileus_008665, Odocoileus_009014, Odocoileus_010192, Odocoileus_010267, Odocoileus_010730, Odocoileus_021093, Odocoileus_021094, Odocoileus_021337, Odocoileus_022144, Odocoileus_022372
GO:0036211	BP	e	protein modification process	19/170	19/28017	2.67025e-43	5	19	2.95597e-40	2.8815e-40	2.86251e-40	7.5794e-42	Odocoileus_000052, Odocoileus_006245, Odocoileus_006488, Odocoileus_007894, Odocoileus_009263, Odocoileus_010625, Odocoileus_010732, Odocoileus_010891, Odocoileus_011924, Odocoileus_012471, Odocoileus_013866, Odocoileus_013880, Odocoileus_014765, Odocoileus_019619, Odocoileus_019661, Odocoileus_020256, Odocoileus_020528, Odocoileus_021592, Odocoileus_022393
GO:0006725	BP	e	cellular aromatic compound metabolic process	19/170	19/28017	2.67025e-43	3	19	2.95597e-40	2.8815e-40	2.86251e-40	7.5794e-42	Odocoileus_000569, Odocoileus_001768, Odocoileus_002350, Odocoileus_002352, Odocoileus_003128, Odocoileus_006245, Odocoileus_006382, Odocoileus_007342, Odocoileus_007513, Odocoileus_008665, Odocoileus_009014, Odocoileus_010192, Odocoileus_010267, Odocoileus_010730, Odocoileus_021093, Odocoileus_021094, Odocoileus_021337, Odocoileus_022144, Odocoileus_022372
GO:0048583	BP	e	regulation of response to stimulus	18/170	18/28017	4.91871e-41	3	18	5.44501e-38	5.30784e-38	5.25318e-38	1.29643e-39	Odocoileus_000384, Odocoileus_001176, Odocoileus_001225, Odocoileus_005753, Odocoileus_005952, Odocoileus_005953, Odocoileus_005955, Odocoileus_006245, Odocoileus_008493, Odocoileus_009263, Odocoileus_010192, Odocoileus_010267, Odocoileus_010732, Odocoileus_012086, Odocoileus_012467, Odocoileus_014765, Odocoileus_019458, Odocoileus_022393
GO:0007186	BP	e	G protein-coupled receptor signaling pathway	18/170	18/28017	4.91871e-41	5	18	5.44501e-38	5.30784e-38	5.25318e-38	1.29643e-39	Odocoileus_003349, Odocoileus_006245, Odocoileus_006247, Odocoileus_006264, Odocoileus_006265, Odocoileus_006296, Odocoileus_006917, Odocoileus_007245, Odocoileus_007513, Odocoileus_009263, Odocoileus_012192, Odocoileus_019552, Odocoileus_022329, Odocoileus_023408, Odocoileus_024811, Odocoileus_025346, Odocoileus_025347, Odocoileus_027336
GO:0006139	BP	e	nucleobase-containing compound metabolic process	18/170	18/28017	4.91871e-41	4	18	5.44501e-38	5.30784e-38	5.25318e-38	1.29643e-39	Odocoileus_000569, Odocoileus_001768, Odocoileus_002350, Odocoileus_002352, Odocoileus_003128, Odocoileus_006245, Odocoileus_006382, Odocoileus_007513, Odocoileus_008665, Odocoileus_009014, Odocoileus_010192, Odocoileus_010267, Odocoileus_010730, Odocoileus_021093, Odocoileus_021094, Odocoileus_021337, Odocoileus_022144, Odocoileus_022372
GO:0048519	BP	e	negative regulation of biological process	17/170	17/28017	9.00155e-39	3	17	9.96472e-36	9.7137e-36	9.58665e-36	2.31738e-37	Odocoileus_000206, Odocoileus_000218, Odocoileus_002352, Odocoileus_003128, Odocoileus_005753, Odocoileus_006138, Odocoileus_006245, Odocoileus_006475, Odocoileus_008608, Odocoileus_009014, Odocoileus_010192, Odocoileus_012472, Odocoileus_014765, Odocoileus_019161, Odocoileus_019458, Odocoileus_020590, Odocoileus_021694
GO:0006793	BP	e	phosphorus metabolic process	16/170	16/28017	1.6367e-36	3	16	1.81183e-33	1.76619e-33	1.74145e-33	3.93877e-35	Odocoileus_006245, Odocoileus_006488, Odocoileus_009263, Odocoileus_010267, Odocoileus_010625, Odocoileus_010732, Odocoileus_010891, Odocoileus_013866, Odocoileus_014765, Odocoileus_019619, Odocoileus_019661, Odocoileus_020256, Odocoileus_021592, Odocoileus_021921, Odocoileus_022372, Odocoileus_022393
GO:0048518	BP	e	positive regulation of biological process	16/170	16/28017	1.6367e-36	3	16	1.81183e-33	1.76619e-33	1.74145e-33	3.93877e-35	Odocoileus_000178, Odocoileus_000384, Odocoileus_001225, Odocoileus_003349, Odocoileus_006245, Odocoileus_006382, Odocoileus_006488, Odocoileus_009014, Odocoileus_009263, Odocoileus_010192, Odocoileus_010594, Odocoileus_010732, Odocoileus_019161, Odocoileus_020822, Odocoileus_021592, Odocoileus_022393
GO:0006796	BP	e	phosphate-containing compound metabolic process	16/170	16/28017	1.6367e-36	4	16	1.81183e-33	1.76619e-33	1.74145e-33	3.93877e-35	Odocoileus_006245, Odocoileus_006488, Odocoileus_009263, Odocoileus_010267, Odocoileus_010625, Odocoileus_010732, Odocoileus_010891, Odocoileus_013866, Odocoileus_014765, Odocoileus_019619, Odocoileus_019661, Odocoileus_020256, Odocoileus_021592, Odocoileus_021921, Odocoileus_022372, Odocoileus_022393
GO:0090304	BP	e	nucleic acid metabolic process	15/170	15/28017	2.95684e-34	5	15	3.27322e-31	3.19076e-31	3.13721e-31	6.54644e-33	Odocoileus_000569, Odocoileus_001768, Odocoileus_002350, Odocoileus_002352, Odocoileus_003128, Odocoileus_006245, Odocoileus_006382, Odocoileus_007513, Odocoileus_008665, Odocoileus_009014, Odocoileus_010192, Odocoileus_010730, Odocoileus_021093, Odocoileus_021094, Odocoileus_021337
GO:0044281	BP	e	small molecule metabolic process	15/170	15/28017	2.95684e-34	2	15	3.27322e-31	3.19076e-31	3.13721e-31	6.54644e-33	Odocoileus_006245, Odocoileus_007342, Odocoileus_007513, Odocoileus_008298, Odocoileus_009014, Odocoileus_010267, Odocoileus_010625, Odocoileus_012450, Odocoileus_019322, Odocoileus_021093, Odocoileus_021094, Odocoileus_022144, Odocoileus_022372, Odocoileus_023391, Odocoileus_024966
GO:0050896	BP	e	response to stimulus	15/170	15/28017	2.95684e-34	1	15	3.27322e-31	3.19076e-31	3.13721e-31	6.54644e-33	Odocoileus_000127, Odocoileus_000381, Odocoileus_000384, Odocoileus_006245, Odocoileus_006475, Odocoileus_007907, Odocoileus_008665, Odocoileus_009263, Odocoileus_010192, Odocoileus_010267, Odocoileus_021337, Odocoileus_022226, Odocoileus_022393, Odocoileus_025827, Odocoileus_027318
GO:0048523	BP	e	negative regulation of cellular process	15/170	15/28017	2.95684e-34	4	15	3.27322e-31	3.19076e-31	3.13721e-31	6.54644e-33	Odocoileus_000206, Odocoileus_000218, Odocoileus_002352, Odocoileus_003128, Odocoileus_005753, Odocoileus_006138, Odocoileus_006475, Odocoileus_008608, Odocoileus_009014, Odocoileus_012472, Odocoileus_014765, Odocoileus_019161, Odocoileus_019458, Odocoileus_020590, Odocoileus_021694
GO:0023051	BP	e	regulation of signaling	14/170	14/28017	5.30772e-32	3	14	5.87564e-29	5.72763e-29	5.61025e-29	1.10861e-30	Odocoileus_000384, Odocoileus_001176, Odocoileus_001225, Odocoileus_003349, Odocoileus_005753, Odocoileus_005952, Odocoileus_005953, Odocoileus_005955, Odocoileus_006245, Odocoileus_008493, Odocoileus_010732, Odocoileus_012467, Odocoileus_014765, Odocoileus_019458
GO:0010646	BP	e	regulation of cell communication	14/170	14/28017	5.30772e-32	4	14	5.87564e-29	5.72763e-29	5.61025e-29	1.10861e-30	Odocoileus_000384, Odocoileus_001176, Odocoileus_001225, Odocoileus_003349, Odocoileus_005753, Odocoileus_005952, Odocoileus_005953, Odocoileus_005955, Odocoileus_006245, Odocoileus_008493, Odocoileus_010732, Odocoileus_012467, Odocoileus_014765, Odocoileus_019458
GO:0071702	BP	e	organic substance transport	14/170	14/28017	5.30772e-32	4	14	5.87564e-29	5.72763e-29	5.61025e-29	1.10861e-30	Odocoileus_000455, Odocoileus_005251, Odocoileus_005834, Odocoileus_006245, Odocoileus_007504, Odocoileus_007878, Odocoileus_009014, Odocoileus_009263, Odocoileus_010625, Odocoileus_010702, Odocoileus_010732, Odocoileus_019441, Odocoileus_025133, Odocoileus_025491
GO:0048522	BP	e	positive regulation of cellular process	13/170	13/28017	9.46734e-30	4	13	1.04803e-26	1.02163e-26	9.97858e-27	1.83866e-28	Odocoileus_000178, Odocoileus_000384, Odocoileus_001225, Odocoileus_003349, Odocoileus_006245, Odocoileus_006382, Odocoileus_006488, Odocoileus_009014, Odocoileus_010192, Odocoileus_010594, Odocoileus_019161, Odocoileus_020822, Odocoileus_021592
GO:0022607	BP	e	cellular component assembly	13/170	13/28017	9.46734e-30	4	13	1.04803e-26	1.02163e-26	9.97858e-27	1.83866e-28	Odocoileus_000052, Odocoileus_000178, Odocoileus_000381, Odocoileus_000569, Odocoileus_006245, Odocoileus_007509, Odocoileus_010625, Odocoileus_010804, Odocoileus_019829, Odocoileus_020310, Odocoileus_020767, Odocoileus_021337, Odocoileus_022329
GO:0032502	BP	e	developmental process	13/170	13/28017	9.46734e-30	1	13	1.04803e-26	1.02163e-26	9.97858e-27	1.83866e-28	Odocoileus_002255, Odocoileus_002684, Odocoileus_005218, Odocoileus_006245, Odocoileus_006488, Odocoileus_014765, Odocoileus_019161, Odocoileus_020767, Odocoileus_020822, Odocoileus_021592, Odocoileus_022329, Odocoileus_022393, Odocoileus_025134
GO:0009966	BP	e	regulation of signal transduction	13/170	13/28017	9.46734e-30	5	13	1.04803e-26	1.02163e-26	9.97858e-27	1.83866e-28	Odocoileus_000384, Odocoileus_001176, Odocoileus_001225, Odocoileus_005753, Odocoileus_005952, Odocoileus_005953, Odocoileus_005955, Odocoileus_006245, Odocoileus_008493, Odocoileus_010732, Odocoileus_012467, Odocoileus_014765, Odocoileus_019458
GO:0032501	BP	e	multicellular organismal process	12/170	12/28017	1.67806e-27	1	12	1.85761e-24	1.81081e-24	1.76196e-24	3.04526e-26	Odocoileus_005218, Odocoileus_006245, Odocoileus_006264, Odocoileus_006265, Odocoileus_006488, Odocoileus_020767, Odocoileus_021592, Odocoileus_021915, Odocoileus_022329, Odocoileus_022393, Odocoileus_023408, Odocoileus_027336
GO:0009058	BP	e	biosynthetic process	12/170	12/28017	1.67806e-27	2	12	1.85761e-24	1.81081e-24	1.76196e-24	3.04526e-26	Odocoileus_000569, Odocoileus_006245, Odocoileus_006382, Odocoileus_007342, Odocoileus_008665, Odocoileus_012356, Odocoileus_012450, Odocoileus_021907, Odocoileus_022144, Odocoileus_022329, Odocoileus_022372, Odocoileus_024966
GO:0016070	BP	e	RNA metabolic process	12/170	12/28017	1.67806e-27	6	12	1.85761e-24	1.81081e-24	1.76196e-24	3.04526e-26	Odocoileus_000569, Odocoileus_001768, Odocoileus_002350, Odocoileus_003128, Odocoileus_006245, Odocoileus_006382, Odocoileus_007513, Odocoileus_009014, Odocoileus_010192, Odocoileus_010730, Odocoileus_021093, Odocoileus_021094
GO:0006950	BP	e	response to stress	12/170	12/28017	1.67806e-27	2	12	1.85761e-24	1.81081e-24	1.76196e-24	3.04526e-26	Odocoileus_000381, Odocoileus_000384, Odocoileus_006245, Odocoileus_006475, Odocoileus_007907, Odocoileus_008665, Odocoileus_010192, Odocoileus_010267, Odocoileus_021337, Odocoileus_022226, Odocoileus_022393, Odocoileus_027318
GO:0006082	BP	e	organic acid metabolic process	11/170	11/28017	2.9557e-25	3	11	3.27196e-22	3.18954e-22	3.09166e-22	4.67423e-24	Odocoileus_007513, Odocoileus_008298, Odocoileus_009014, Odocoileus_010625, Odocoileus_012450, Odocoileus_019322, Odocoileus_021093, Odocoileus_021094, Odocoileus_022144, Odocoileus_023391, Odocoileus_024966
GO:1901576	BP	e	organic substance biosynthetic process	11/170	11/28017	2.9557e-25	3	11	3.27196e-22	3.18954e-22	3.09166e-22	4.67423e-24	Odocoileus_000569, Odocoileus_006245, Odocoileus_006382, Odocoileus_007342, Odocoileus_008665, Odocoileus_012356, Odocoileus_021907, Odocoileus_022144, Odocoileus_022329, Odocoileus_022372, Odocoileus_024966
GO:0051641	BP	e	cellular localization	11/170	11/28017	2.9557e-25	2	11	3.27196e-22	3.18954e-22	3.09166e-22	4.67423e-24	Odocoileus_000455, Odocoileus_006245, Odocoileus_009014, Odocoileus_009263, Odocoileus_010368, Odocoileus_010702, Odocoileus_010732, Odocoileus_019441, Odocoileus_021041, Odocoileus_023460, Odocoileus_025133
GO:0035556	BP	e	intracellular signal transduction	11/170	11/28017	2.9557e-25	5	11	3.27196e-22	3.18954e-22	3.09166e-22	4.67423e-24	Odocoileus_001081, Odocoileus_002255, Odocoileus_002352, Odocoileus_002715, Odocoileus_006245, Odocoileus_006475, Odocoileus_009014, Odocoileus_009101, Odocoileus_010192, Odocoileus_013819, Odocoileus_022019
GO:0019752	BP	e	carboxylic acid metabolic process	11/170	11/28017	2.9557e-25	5	11	3.27196e-22	3.18954e-22	3.09166e-22	4.67423e-24	Odocoileus_007513, Odocoileus_008298, Odocoileus_009014, Odocoileus_010625, Odocoileus_012450, Odocoileus_019322, Odocoileus_021093, Odocoileus_021094, Odocoileus_022144, Odocoileus_023391, Odocoileus_024966
GO:0016310	BP	e	phosphorylation	11/170	11/28017	2.9557e-25	5	11	3.27196e-22	3.18954e-22	3.09166e-22	4.67423e-24	Odocoileus_006245, Odocoileus_006488, Odocoileus_009263, Odocoileus_010625, Odocoileus_010732, Odocoileus_013866, Odocoileus_019619, Odocoileus_020256, Odocoileus_021592, Odocoileus_021921, Odocoileus_022393
GO:0043436	BP	e	oxoacid metabolic process	11/170	11/28017	2.9557e-25	4	11	3.27196e-22	3.18954e-22	3.09166e-22	4.67423e-24	Odocoileus_007513, Odocoileus_008298, Odocoileus_009014, Odocoileus_010625, Odocoileus_012450, Odocoileus_019322, Odocoileus_021093, Odocoileus_021094, Odocoileus_022144, Odocoileus_023391, Odocoileus_024966
GO:0055085	BP	e	transmembrane transport	11/170	11/28017	2.9557e-25	4	11	3.27196e-22	3.18954e-22	3.09166e-22	4.67423e-24	Odocoileus_001176, Odocoileus_005251, Odocoileus_005834, Odocoileus_006245, Odocoileus_007504, Odocoileus_007878, Odocoileus_008154, Odocoileus_009263, Odocoileus_010625, Odocoileus_013819, Odocoileus_020018
GO:0043933	BP	e	protein-containing complex organization	11/170	11/28017	2.9557e-25	4	11	3.27196e-22	3.18954e-22	3.09166e-22	4.67423e-24	Odocoileus_000052, Odocoileus_000178, Odocoileus_000569, Odocoileus_000987, Odocoileus_006245, Odocoileus_007509, Odocoileus_010525, Odocoileus_010625, Odocoileus_019829, Odocoileus_021337, Odocoileus_022329
GO:0044249	BP	e	cellular biosynthetic process	10/170	10/28017	5.17377e-23	3	10	5.72736e-20	5.58308e-20	5.3652e-20	7.34277e-22	Odocoileus_000569, Odocoileus_006245, Odocoileus_006382, Odocoileus_007342, Odocoileus_008665, Odocoileus_012356, Odocoileus_021907, Odocoileus_022144, Odocoileus_022329, Odocoileus_022372
GO:0006996	BP	e	organelle organization	10/170	10/28017	5.17377e-23	4	10	5.72736e-20	5.58308e-20	5.3652e-20	7.34277e-22	Odocoileus_000175, Odocoileus_000381, Odocoileus_006245, Odocoileus_009014, Odocoileus_010525, Odocoileus_010804, Odocoileus_019829, Odocoileus_020310, Odocoileus_021337, Odocoileus_025491
GO:0051716	BP	e	cellular response to stimulus	10/170	10/28017	5.17377e-23	2	10	5.72736e-20	5.58308e-20	5.3652e-20	7.34277e-22	Odocoileus_000381, Odocoileus_000384, Odocoileus_006475, Odocoileus_008665, Odocoileus_009263, Odocoileus_010192, Odocoileus_021337, Odocoileus_022226, Odocoileus_025827, Odocoileus_027318
GO:0065008	BP	e	regulation of biological quality	10/170	10/28017	5.17377e-23	2	10	5.72736e-20	5.58308e-20	5.3652e-20	7.34277e-22	Odocoileus_000178, Odocoileus_000455, Odocoileus_001176, Odocoileus_003349, Odocoileus_006245, Odocoileus_008154, Odocoileus_010732, Odocoileus_010804, Odocoileus_022329, Odocoileus_025755
GO:0007166	BP	e	cell surface receptor signaling pathway	10/170	10/28017	5.17377e-23	5	10	5.72736e-20	5.58308e-20	5.3652e-20	7.34277e-22	Odocoileus_003225, Odocoileus_003349, Odocoileus_006488, Odocoileus_009014, Odocoileus_009263, Odocoileus_010192, Odocoileus_010625, Odocoileus_019619, Odocoileus_021592, Odocoileus_022393
GO:0006468	BP	e	protein phosphorylation	10/170	10/28017	5.17377e-23	6	10	5.72736e-20	5.58308e-20	5.3652e-20	7.34277e-22	Odocoileus_006245, Odocoileus_006488, Odocoileus_009263, Odocoileus_010625, Odocoileus_010732, Odocoileus_013866, Odocoileus_019619, Odocoileus_020256, Odocoileus_021592, Odocoileus_022393
GO:0065009	BP	e	regulation of molecular function	10/170	10/28017	5.17377e-23	2	10	5.72736e-20	5.58308e-20	5.3652e-20	7.34277e-22	Odocoileus_002255, Odocoileus_003624, Odocoileus_006245, Odocoileus_006488, Odocoileus_009014, Odocoileus_010625, Odocoileus_010732, Odocoileus_012271, Odocoileus_021592, Odocoileus_023460
GO:0009056	BP	e	catabolic process	10/170	10/28017	5.17377e-23	2	10	5.72736e-20	5.58308e-20	5.3652e-20	7.34277e-22	Odocoileus_000381, Odocoileus_003128, Odocoileus_006245, Odocoileus_008298, Odocoileus_010267, Odocoileus_010625, Odocoileus_010732, Odocoileus_019322, Odocoileus_019441, Odocoileus_022226
GO:0006811	BP	e	monoatomic ion transport	9/170	9/28017	9.00043e-21	4	9	9.96348e-18	9.71249e-18	9.26144e-18	1.17217e-19	Odocoileus_001176, Odocoileus_005251, Odocoileus_006245, Odocoileus_007504, Odocoileus_007878, Odocoileus_007907, Odocoileus_008154, Odocoileus_009263, Odocoileus_020018
GO:0065003	BP	e	protein-containing complex assembly	9/170	9/28017	9.00043e-21	5	9	9.96348e-18	9.71249e-18	9.26144e-18	1.17217e-19	Odocoileus_000052, Odocoileus_000178, Odocoileus_000569, Odocoileus_006245, Odocoileus_007509, Odocoileus_010625, Odocoileus_019829, Odocoileus_021337, Odocoileus_022329
GO:0044271	BP	e	cellular nitrogen compound biosynthetic process	9/170	9/28017	9.00043e-21	4	9	9.96348e-18	9.71249e-18	9.26144e-18	1.17217e-19	Odocoileus_000569, Odocoileus_006245, Odocoileus_006382, Odocoileus_007342, Odocoileus_012356, Odocoileus_021907, Odocoileus_022144, Odocoileus_022329, Odocoileus_022372
GO:0006520	BP	e	amino acid metabolic process	9/170	9/28017	9.00043e-21	6	9	9.96348e-18	9.71249e-18	9.26144e-18	1.17217e-19	Odocoileus_007513, Odocoileus_009014, Odocoileus_010625, Odocoileus_012450, Odocoileus_019322, Odocoileus_021093, Odocoileus_021094, Odocoileus_022144, Odocoileus_023391
GO:1901575	BP	e	organic substance catabolic process	9/170	9/28017	9.00043e-21	3	9	9.96348e-18	9.71249e-18	9.26144e-18	1.17217e-19	Odocoileus_000381, Odocoileus_003128, Odocoileus_006245, Odocoileus_008298, Odocoileus_010267, Odocoileus_010625, Odocoileus_010732, Odocoileus_019322, Odocoileus_022226
GO:0048856	BP	e	anatomical structure development	9/170	9/28017	9.00043e-21	2	9	9.96348e-18	9.71249e-18	9.26144e-18	1.17217e-19	Odocoileus_002684, Odocoileus_005218, Odocoileus_006245, Odocoileus_006488, Odocoileus_019161, Odocoileus_020767, Odocoileus_021592, Odocoileus_022329, Odocoileus_025134
GO:0044093	BP	e	positive regulation of molecular function	9/170	9/28017	9.00043e-21	3	9	9.96348e-18	9.71249e-18	9.26144e-18	1.17217e-19	Odocoileus_002255, Odocoileus_003624, Odocoileus_006245, Odocoileus_006488, Odocoileus_009014, Odocoileus_010625, Odocoileus_010732, Odocoileus_012271, Odocoileus_021592
GO:1902531	BP	e	regulation of intracellular signal transduction	8/170	8/28017	1.55613e-18	6	8	1.72264e-15	1.67924e-15	1.59036e-15	1.77591e-17	Odocoileus_000384, Odocoileus_001176, Odocoileus_001225, Odocoileus_005753, Odocoileus_006245, Odocoileus_010732, Odocoileus_012467, Odocoileus_014765
GO:0008104	BP	e	protein localization	8/170	8/28017	1.55613e-18	4	8	1.72264e-15	1.67924e-15	1.59036e-15	1.77591e-17	Odocoileus_000455, Odocoileus_006245, Odocoileus_009014, Odocoileus_009263, Odocoileus_010368, Odocoileus_010702, Odocoileus_010732, Odocoileus_019441
GO:0033554	BP	e	cellular response to stress	8/170	8/28017	1.55613e-18	3	8	1.72264e-15	1.67924e-15	1.59036e-15	1.77591e-17	Odocoileus_000381, Odocoileus_000384, Odocoileus_006475, Odocoileus_008665, Odocoileus_010192, Odocoileus_021337, Odocoileus_022226, Odocoileus_027318
GO:0034660	BP	e	ncRNA metabolic process	8/170	8/28017	1.55613e-18	7	8	1.72264e-15	1.67924e-15	1.59036e-15	1.77591e-17	Odocoileus_001768, Odocoileus_006382, Odocoileus_007513, Odocoileus_009014, Odocoileus_010192, Odocoileus_010730, Odocoileus_021093, Odocoileus_021094
GO:0070727	BP	e	cellular macromolecule localization	8/170	8/28017	1.55613e-18	3	8	1.72264e-15	1.67924e-15	1.59036e-15	1.77591e-17	Odocoileus_000455, Odocoileus_006245, Odocoileus_009014, Odocoileus_009263, Odocoileus_010368, Odocoileus_010702, Odocoileus_010732, Odocoileus_019441
GO:0033036	BP	e	macromolecule localization	8/170	8/28017	1.55613e-18	2	8	1.72264e-15	1.67924e-15	1.59036e-15	1.77591e-17	Odocoileus_000455, Odocoileus_006245, Odocoileus_009014, Odocoileus_009263, Odocoileus_010368, Odocoileus_010702, Odocoileus_010732, Odocoileus_019441
GO:0071705	BP	e	nitrogen compound transport	8/170	8/28017	1.55613e-18	4	8	1.72264e-15	1.67924e-15	1.59036e-15	1.77591e-17	Odocoileus_000455, Odocoileus_005251, Odocoileus_005834, Odocoileus_009014, Odocoileus_010702, Odocoileus_010732, Odocoileus_019441, Odocoileus_025133
GO:0050790	BP	e	regulation of catalytic activity	8/170	8/28017	1.55613e-18	3	8	1.72264e-15	1.67924e-15	1.59036e-15	1.77591e-17	Odocoileus_002255, Odocoileus_003624, Odocoileus_006488, Odocoileus_009014, Odocoileus_010732, Odocoileus_012271, Odocoileus_021592, Odocoileus_023460
GO:0046907	BP	e	intracellular transport	8/170	8/28017	1.55613e-18	4	8	1.72264e-15	1.67924e-15	1.59036e-15	1.77591e-17	Odocoileus_000455, Odocoileus_009014, Odocoileus_010702, Odocoileus_010732, Odocoileus_019441, Odocoileus_021041, Odocoileus_023460, Odocoileus_025133
GO:0009893	BP	e	positive regulation of metabolic process	8/170	8/28017	1.55613e-18	4	8	1.72264e-15	1.67924e-15	1.59036e-15	1.77591e-17	Odocoileus_000178, Odocoileus_006245, Odocoileus_006382, Odocoileus_006488, Odocoileus_010192, Odocoileus_010732, Odocoileus_020822, Odocoileus_021592
GO:0006508	BP	e	proteolysis	8/170	8/28017	1.55613e-18	5	8	1.72264e-15	1.67924e-15	1.59036e-15	1.77591e-17	Odocoileus_000381, Odocoileus_002286, Odocoileus_006245, Odocoileus_009014, Odocoileus_010625, Odocoileus_010732, Odocoileus_022226, Odocoileus_024967
GO:0051649	BP	e	establishment of localization in cell	8/170	8/28017	1.55613e-18	3	8	1.72264e-15	1.67924e-15	1.59036e-15	1.77591e-17	Odocoileus_000455, Odocoileus_009014, Odocoileus_010702, Odocoileus_010732, Odocoileus_019441, Odocoileus_021041, Odocoileus_023460, Odocoileus_025133
GO:0010605	BP	e	negative regulation of macromolecule metabolic process	7/170	7/28017	2.67406e-16	5	7	2.96019e-13	2.88562e-13	2.7008e-13	2.64302e-15	Odocoileus_000206, Odocoileus_000218, Odocoileus_003128, Odocoileus_006138, Odocoileus_008608, Odocoileus_012472, Odocoileus_019161
GO:0010558	BP	e	negative regulation of macromolecule biosynthetic process	7/170	7/28017	2.67406e-16	7	7	2.96019e-13	2.88562e-13	2.7008e-13	2.64302e-15	Odocoileus_000206, Odocoileus_000218, Odocoileus_003128, Odocoileus_006138, Odocoileus_008608, Odocoileus_012472, Odocoileus_019161
GO:0002682	BP	e	regulation of immune system process	7/170	7/28017	2.67406e-16	3	7	2.96019e-13	2.88562e-13	2.7008e-13	2.64302e-15	Odocoileus_006138, Odocoileus_008608, Odocoileus_009263, Odocoileus_010192, Odocoileus_010267, Odocoileus_010594, Odocoileus_022393
GO:0009892	BP	e	negative regulation of metabolic process	7/170	7/28017	2.67406e-16	4	7	2.96019e-13	2.88562e-13	2.7008e-13	2.64302e-15	Odocoileus_000206, Odocoileus_000218, Odocoileus_003128, Odocoileus_006138, Odocoileus_008608, Odocoileus_012472, Odocoileus_019161
GO:0009890	BP	e	negative regulation of biosynthetic process	7/170	7/28017	2.67406e-16	5	7	2.96019e-13	2.88562e-13	2.7008e-13	2.64302e-15	Odocoileus_000206, Odocoileus_000218, Odocoileus_003128, Odocoileus_006138, Odocoileus_008608, Odocoileus_012472, Odocoileus_019161
GO:1901566	BP	e	organonitrogen compound biosynthetic process	7/170	7/28017	2.67406e-16	4	7	2.96019e-13	2.88562e-13	2.7008e-13	2.64302e-15	Odocoileus_006245, Odocoileus_007342, Odocoileus_012356, Odocoileus_021907, Odocoileus_022144, Odocoileus_022329, Odocoileus_022372
GO:1901565	BP	e	organonitrogen compound catabolic process	7/170	7/28017	2.67406e-16	4	7	2.96019e-13	2.88562e-13	2.7008e-13	2.64302e-15	Odocoileus_000381, Odocoileus_006245, Odocoileus_010267, Odocoileus_010625, Odocoileus_010732, Odocoileus_019322, Odocoileus_022226
GO:0043085	BP	e	positive regulation of catalytic activity	7/170	7/28017	2.67406e-16	4	7	2.96019e-13	2.88562e-13	2.7008e-13	2.64302e-15	Odocoileus_002255, Odocoileus_003624, Odocoileus_006488, Odocoileus_009014, Odocoileus_010732, Odocoileus_012271, Odocoileus_021592
GO:0031325	BP	e	positive regulation of cellular metabolic process	7/170	7/28017	2.67406e-16	5	7	2.96019e-13	2.88562e-13	2.7008e-13	2.64302e-15	Odocoileus_000178, Odocoileus_006245, Odocoileus_006382, Odocoileus_006488, Odocoileus_010192, Odocoileus_020822, Odocoileus_021592
GO:0031324	BP	e	negative regulation of cellular metabolic process	7/170	7/28017	2.67406e-16	5	7	2.96019e-13	2.88562e-13	2.7008e-13	2.64302e-15	Odocoileus_000206, Odocoileus_000218, Odocoileus_003128, Odocoileus_006138, Odocoileus_008608, Odocoileus_012472, Odocoileus_019161
GO:0051128	BP	e	regulation of cellular component organization	7/170	7/28017	2.67406e-16	4	7	2.96019e-13	2.88562e-13	2.7008e-13	2.64302e-15	Odocoileus_000455, Odocoileus_001176, Odocoileus_006245, Odocoileus_009014, Odocoileus_010525, Odocoileus_010594, Odocoileus_010732
GO:0006812	BP	e	monoatomic cation transport	7/170	7/28017	2.67406e-16	5	7	2.96019e-13	2.88562e-13	2.7008e-13	2.64302e-15	Odocoileus_005251, Odocoileus_007504, Odocoileus_007878, Odocoileus_007907, Odocoileus_008154, Odocoileus_009263, Odocoileus_020018
GO:0031327	BP	e	negative regulation of cellular biosynthetic process	7/170	7/28017	2.67406e-16	6	7	2.96019e-13	2.88562e-13	2.7008e-13	2.64302e-15	Odocoileus_000206, Odocoileus_000218, Odocoileus_003128, Odocoileus_006138, Odocoileus_008608, Odocoileus_012472, Odocoileus_019161
GO:0003008	BP	e	system process	7/170	7/28017	2.67406e-16	2	7	2.96019e-13	2.88562e-13	2.7008e-13	2.64302e-15	Odocoileus_005218, Odocoileus_006245, Odocoileus_006264, Odocoileus_006265, Odocoileus_022329, Odocoileus_023408, Odocoileus_027336
GO:0051239	BP	e	regulation of multicellular organismal process	7/170	7/28017	2.67406e-16	3	7	2.96019e-13	2.88562e-13	2.7008e-13	2.64302e-15	Odocoileus_006138, Odocoileus_006245, Odocoileus_008608, Odocoileus_010192, Odocoileus_010594, Odocoileus_019161, Odocoileus_022329
GO:0098662	BP	e	inorganic cation transmembrane transport	6/170	6/28017	4.56726e-14	6	6	5.05596e-11	4.9286e-11	4.54443e-11	3.85951e-13	Odocoileus_005251, Odocoileus_007504, Odocoileus_007878, Odocoileus_008154, Odocoileus_009263, Odocoileus_020018
GO:0044248	BP	e	cellular catabolic process	6/170	6/28017	4.56726e-14	3	6	5.05596e-11	4.9286e-11	4.54443e-11	3.85951e-13	Odocoileus_003128, Odocoileus_008298, Odocoileus_010267, Odocoileus_010625, Odocoileus_019322, Odocoileus_019441
GO:0034220	BP	e	monoatomic ion transmembrane transport	6/170	6/28017	4.56726e-14	5	6	5.05596e-11	4.9286e-11	4.54443e-11	3.85951e-13	Odocoileus_005251, Odocoileus_007504, Odocoileus_007878, Odocoileus_008154, Odocoileus_009263, Odocoileus_020018
GO:0051253	BP	e	negative regulation of RNA metabolic process	6/170	6/28017	4.56726e-14	7	6	5.05596e-11	4.9286e-11	4.54443e-11	3.85951e-13	Odocoileus_000206, Odocoileus_000218, Odocoileus_006138, Odocoileus_008608, Odocoileus_012472, Odocoileus_019161
GO:0051172	BP	e	negative regulation of nitrogen compound metabolic process	6/170	6/28017	4.56726e-14	5	6	5.05596e-11	4.9286e-11	4.54443e-11	3.85951e-13	Odocoileus_000206, Odocoileus_000218, Odocoileus_006138, Odocoileus_008608, Odocoileus_012472, Odocoileus_019161
GO:0080134	BP	e	regulation of response to stress	6/170	6/28017	4.56726e-14	4	6	5.05596e-11	4.9286e-11	4.54443e-11	3.85951e-13	Odocoileus_009263, Odocoileus_010192, Odocoileus_010267, Odocoileus_012086, Odocoileus_012467, Odocoileus_014765
GO:1902679	BP	e	negative regulation of RNA biosynthetic process	6/170	6/28017	4.56726e-14	8	6	5.05596e-11	4.9286e-11	4.54443e-11	3.85951e-13	Odocoileus_000206, Odocoileus_000218, Odocoileus_006138, Odocoileus_008608, Odocoileus_012472, Odocoileus_019161
GO:0098660	BP	e	inorganic ion transmembrane transport	6/170	6/28017	4.56726e-14	5	6	5.05596e-11	4.9286e-11	4.54443e-11	3.85951e-13	Odocoileus_005251, Odocoileus_007504, Odocoileus_007878, Odocoileus_008154, Odocoileus_009263, Odocoileus_020018
GO:0006399	BP	e	tRNA metabolic process	6/170	6/28017	4.56726e-14	8	6	5.05596e-11	4.9286e-11	4.54443e-11	3.85951e-13	Odocoileus_007513, Odocoileus_009014, Odocoileus_010192, Odocoileus_010730, Odocoileus_021093, Odocoileus_021094
GO:0006629	BP	e	lipid metabolic process	6/170	6/28017	4.56726e-14	3	6	5.05596e-11	4.9286e-11	4.54443e-11	3.85951e-13	Odocoileus_006245, Odocoileus_008298, Odocoileus_009101, Odocoileus_010625, Odocoileus_022019, Odocoileus_025446
GO:0010604	BP	e	positive regulation of macromolecule metabolic process	6/170	6/28017	4.56726e-14	5	6	5.05596e-11	4.9286e-11	4.54443e-11	3.85951e-13	Odocoileus_000178, Odocoileus_006245, Odocoileus_006382, Odocoileus_010192, Odocoileus_010732, Odocoileus_020822
GO:0000122	BP	e	negative regulation of transcription by RNA polymerase II	6/170	6/28017	4.56726e-14	10	6	5.05596e-11	4.9286e-11	4.54443e-11	3.85951e-13	Odocoileus_000206, Odocoileus_000218, Odocoileus_006138, Odocoileus_008608, Odocoileus_012472, Odocoileus_019161
GO:0045892	BP	e	negative regulation of DNA-templated transcription	6/170	6/28017	4.56726e-14	9	6	5.05596e-11	4.9286e-11	4.54443e-11	3.85951e-13	Odocoileus_000206, Odocoileus_000218, Odocoileus_006138, Odocoileus_008608, Odocoileus_012472, Odocoileus_019161
GO:0007155	BP	e	cell adhesion	6/170	6/28017	4.56726e-14	2	6	5.05596e-11	4.9286e-11	4.54443e-11	3.85951e-13	Odocoileus_005581, Odocoileus_010192, Odocoileus_010625, Odocoileus_020767, Odocoileus_020843, Odocoileus_024836
GO:0098655	BP	e	monoatomic cation transmembrane transport	6/170	6/28017	4.56726e-14	6	6	5.05596e-11	4.9286e-11	4.54443e-11	3.85951e-13	Odocoileus_005251, Odocoileus_007504, Odocoileus_007878, Odocoileus_008154, Odocoileus_009263, Odocoileus_020018
GO:0030001	BP	e	metal ion transport	6/170	6/28017	4.56726e-14	6	6	5.05596e-11	4.9286e-11	4.54443e-11	3.85951e-13	Odocoileus_007504, Odocoileus_007878, Odocoileus_007907, Odocoileus_008154, Odocoileus_009263, Odocoileus_020018
GO:0045934	BP	e	negative regulation of nucleobase-containing compound metabolic process	6/170	6/28017	4.56726e-14	6	6	5.05596e-11	4.9286e-11	4.54443e-11	3.85951e-13	Odocoileus_000206, Odocoileus_000218, Odocoileus_006138, Odocoileus_008608, Odocoileus_012472, Odocoileus_019161
GO:0051173	BP	e	positive regulation of nitrogen compound metabolic process	6/170	6/28017	4.56726e-14	5	6	5.05596e-11	4.9286e-11	4.54443e-11	3.85951e-13	Odocoileus_000178, Odocoileus_006245, Odocoileus_006382, Odocoileus_010192, Odocoileus_010732, Odocoileus_020822
GO:0007154	BP	e	cell communication	6/170	6/28017	4.56726e-14	2	6	5.05596e-11	4.9286e-11	4.54443e-11	3.85951e-13	Odocoileus_000384, Odocoileus_007504, Odocoileus_019552, Odocoileus_021915, Odocoileus_022329, Odocoileus_027264
GO:0010033	BP	e	response to organic substance	5/170	5/28017	7.75383e-12	3	5	8.58349e-09	8.36726e-09	7.56774e-09	5.5737e-11	Odocoileus_000381, Odocoileus_000384, Odocoileus_009263, Odocoileus_022226, Odocoileus_025827
GO:0015031	BP	e	protein transport	5/170	5/28017	7.75383e-12	6	5	8.58349e-09	8.36726e-09	7.56774e-09	5.5737e-11	Odocoileus_000455, Odocoileus_009014, Odocoileus_010702, Odocoileus_010732, Odocoileus_019441
GO:0006396	BP	e	RNA processing	5/170	5/28017	7.75383e-12	7	5	8.58349e-09	8.36726e-09	7.56774e-09	5.5737e-11	Odocoileus_001768, Odocoileus_002350, Odocoileus_006245, Odocoileus_009014, Odocoileus_010192
GO:0007600	BP	e	sensory perception	5/170	5/28017	7.75383e-12	4	5	8.58349e-09	8.36726e-09	7.56774e-09	5.5737e-11	Odocoileus_006245, Odocoileus_006264, Odocoileus_006265, Odocoileus_023408, Odocoileus_027336
GO:0006952	BP	e	defense response	5/170	5/28017	7.75383e-12	3	5	8.58349e-09	8.36726e-09	7.56774e-09	5.5737e-11	Odocoileus_006245, Odocoileus_007907, Odocoileus_010192, Odocoileus_010267, Odocoileus_022393
GO:0032879	BP	e	regulation of localization	5/170	5/28017	7.75383e-12	3	5	8.58349e-09	8.36726e-09	7.56774e-09	5.5737e-11	Odocoileus_000455, Odocoileus_006245, Odocoileus_009014, Odocoileus_010594, Odocoileus_019173
GO:0048584	BP	e	positive regulation of response to stimulus	5/170	5/28017	7.75383e-12	4	5	8.58349e-09	8.36726e-09	7.56774e-09	5.5737e-11	Odocoileus_000384, Odocoileus_001225, Odocoileus_006245, Odocoileus_009263, Odocoileus_022393
GO:0051493	BP	e	regulation of cytoskeleton organization	5/170	5/28017	7.75383e-12	6	5	8.58349e-09	8.36726e-09	7.56774e-09	5.5737e-11	Odocoileus_001176, Odocoileus_006245, Odocoileus_009014, Odocoileus_010525, Odocoileus_010732
GO:0045184	BP	e	establishment of protein localization	5/170	5/28017	7.75383e-12	5	5	8.58349e-09	8.36726e-09	7.56774e-09	5.5737e-11	Odocoileus_000455, Odocoileus_009014, Odocoileus_010702, Odocoileus_010732, Odocoileus_019441
GO:1901362	BP	e	organic cyclic compound biosynthetic process	5/170	5/28017	7.75383e-12	4	5	8.58349e-09	8.36726e-09	7.56774e-09	5.5737e-11	Odocoileus_000569, Odocoileus_006382, Odocoileus_007342, Odocoileus_022144, Odocoileus_022372
GO:0006886	BP	e	intracellular protein transport	5/170	5/28017	7.75383e-12	7	5	8.58349e-09	8.36726e-09	7.56774e-09	5.5737e-11	Odocoileus_000455, Odocoileus_009014, Odocoileus_010702, Odocoileus_010732, Odocoileus_019441
GO:0090066	BP	e	regulation of anatomical structure size	5/170	5/28017	7.75383e-12	3	5	8.58349e-09	8.36726e-09	7.56774e-09	5.5737e-11	Odocoileus_001176, Odocoileus_006245, Odocoileus_008154, Odocoileus_010732, Odocoileus_022329
GO:0042221	BP	e	response to chemical	5/170	5/28017	7.75383e-12	2	5	8.58349e-09	8.36726e-09	7.56774e-09	5.5737e-11	Odocoileus_000381, Odocoileus_000384, Odocoileus_009263, Odocoileus_022226, Odocoileus_025827
GO:0016311	BP	e	dephosphorylation	5/170	5/28017	7.75383e-12	5	5	8.58349e-09	8.36726e-09	7.56774e-09	5.5737e-11	Odocoileus_006245, Odocoileus_010625, Odocoileus_010891, Odocoileus_014765, Odocoileus_019661
GO:0006974	BP	e	DNA damage response	5/170	5/28017	7.75383e-12	4	5	8.58349e-09	8.36726e-09	7.56774e-09	5.5737e-11	Odocoileus_006475, Odocoileus_008665, Odocoileus_010192, Odocoileus_021337, Odocoileus_027318
GO:0050877	BP	e	nervous system process	5/170	5/28017	7.75383e-12	3	5	8.58349e-09	8.36726e-09	7.56774e-09	5.5737e-11	Odocoileus_006245, Odocoileus_006264, Odocoileus_006265, Odocoileus_023408, Odocoileus_027336
GO:0009057	BP	e	macromolecule catabolic process	5/170	5/28017	7.75383e-12	4	5	8.58349e-09	8.36726e-09	7.56774e-09	5.5737e-11	Odocoileus_000381, Odocoileus_003128, Odocoileus_006245, Odocoileus_010732, Odocoileus_022226
GO:0022402	BP	e	cell cycle process	5/170	5/28017	7.75383e-12	2	5	8.58349e-09	8.36726e-09	7.56774e-09	5.5737e-11	Odocoileus_002352, Odocoileus_006475, Odocoileus_009014, Odocoileus_019829, Odocoileus_021337
GO:0018130	BP	e	heterocycle biosynthetic process	5/170	5/28017	7.75383e-12	4	5	8.58349e-09	8.36726e-09	7.56774e-09	5.5737e-11	Odocoileus_000569, Odocoileus_006382, Odocoileus_007342, Odocoileus_022144, Odocoileus_022372
GO:1901135	BP	e	carbohydrate derivative metabolic process	5/170	5/28017	7.75383e-12	3	5	8.58349e-09	8.36726e-09	7.56774e-09	5.5737e-11	Odocoileus_006245, Odocoileus_010267, Odocoileus_010944, Odocoileus_021921, Odocoileus_022372
GO:0033043	BP	e	regulation of organelle organization	5/170	5/28017	7.75383e-12	5	5	8.58349e-09	8.36726e-09	7.56774e-09	5.5737e-11	Odocoileus_001176, Odocoileus_006245, Odocoileus_009014, Odocoileus_010525, Odocoileus_010732
GO:0051603	BP	e	proteolysis involved in protein catabolic process	5/170	5/28017	7.75383e-12	6	5	8.58349e-09	8.36726e-09	7.56774e-09	5.5737e-11	Odocoileus_000381, Odocoileus_002286, Odocoileus_006245, Odocoileus_010732, Odocoileus_022226
GO:0009059	BP	e	macromolecule biosynthetic process	5/170	5/28017	7.75383e-12	4	5	8.58349e-09	8.36726e-09	7.56774e-09	5.5737e-11	Odocoileus_000569, Odocoileus_006245, Odocoileus_006382, Odocoileus_021907, Odocoileus_022329
GO:0048878	BP	e	chemical homeostasis	4/170	4/28017	1.30848e-09	2	4	1.44849e-06	1.412e-06	1.24698e-06	6.67507e-09	Odocoileus_001215, Odocoileus_001290, Odocoileus_007878, Odocoileus_008154
GO:0032970	BP	e	regulation of actin filament-based process	4/170	4/28017	1.30848e-09	4	4	1.44849e-06	1.412e-06	1.24698e-06	6.67507e-09	Odocoileus_001176, Odocoileus_006245, Odocoileus_009014, Odocoileus_010732
GO:0048585	BP	e	negative regulation of response to stimulus	4/170	4/28017	1.30848e-09	4	4	1.44849e-06	1.412e-06	1.24698e-06	6.67507e-09	Odocoileus_005753, Odocoileus_010192, Odocoileus_014765, Odocoileus_019458
GO:0051336	BP	e	regulation of hydrolase activity	4/170	4/28017	1.30848e-09	4	4	1.44849e-06	1.412e-06	1.24698e-06	6.67507e-09	Odocoileus_002255, Odocoileus_003624, Odocoileus_012271, Odocoileus_023460
GO:0009605	BP	e	response to external stimulus	4/170	4/28017	1.30848e-09	2	4	1.44849e-06	1.412e-06	1.24698e-06	6.67507e-09	Odocoileus_000384, Odocoileus_007907, Odocoileus_010267, Odocoileus_022393
GO:1901698	BP	e	response to nitrogen compound	4/170	4/28017	1.30848e-09	3	4	1.44849e-06	1.412e-06	1.24698e-06	6.67507e-09	Odocoileus_000381, Odocoileus_000384, Odocoileus_022226, Odocoileus_025827
GO:0043039	BP	e	tRNA aminoacylation	4/170	4/28017	1.30848e-09	9	4	1.44849e-06	1.412e-06	1.24698e-06	6.67507e-09	Odocoileus_007513, Odocoileus_009014, Odocoileus_021093, Odocoileus_021094
GO:0001817	BP	e	regulation of cytokine production	4/170	4/28017	1.30848e-09	8	4	1.44849e-06	1.412e-06	1.24698e-06	6.67507e-09	Odocoileus_006138, Odocoileus_006245, Odocoileus_008608, Odocoileus_010192
GO:0043067	BP	e	regulation of programmed cell death	4/170	4/28017	1.30848e-09	4	4	1.44849e-06	1.412e-06	1.24698e-06	6.67507e-09	Odocoileus_005753, Odocoileus_006245, Odocoileus_010625, Odocoileus_021789
GO:0006470	BP	e	protein dephosphorylation	4/170	4/28017	1.30848e-09	6	4	1.44849e-06	1.412e-06	1.24698e-06	6.67507e-09	Odocoileus_006245, Odocoileus_010891, Odocoileus_014765, Odocoileus_019661
GO:0006518	BP	e	peptide metabolic process	4/170	4/28017	1.30848e-09	4	4	1.44849e-06	1.412e-06	1.24698e-06	6.67507e-09	Odocoileus_006245, Odocoileus_010625, Odocoileus_021907, Odocoileus_022329
GO:0044255	BP	e	cellular lipid metabolic process	4/170	4/28017	1.30848e-09	4	4	1.44849e-06	1.412e-06	1.24698e-06	6.67507e-09	Odocoileus_006245, Odocoileus_008298, Odocoileus_010625, Odocoileus_025446
GO:0007267	BP	e	cell-cell signaling	4/170	4/28017	1.30848e-09	4	4	1.44849e-06	1.412e-06	1.24698e-06	6.67507e-09	Odocoileus_019552, Odocoileus_021915, Odocoileus_022329, Odocoileus_027264
GO:0007606	BP	e	sensory perception of chemical stimulus	4/170	4/28017	1.30848e-09	5	4	1.44849e-06	1.412e-06	1.24698e-06	6.67507e-09	Odocoileus_006245, Odocoileus_006264, Odocoileus_006265, Odocoileus_023408
GO:0031328	BP	e	positive regulation of cellular biosynthetic process	4/170	4/28017	1.30848e-09	6	4	1.44849e-06	1.412e-06	1.24698e-06	6.67507e-09	Odocoileus_000178, Odocoileus_006245, Odocoileus_006382, Odocoileus_020822
GO:0030030	BP	e	cell projection organization	4/170	4/28017	1.30848e-09	4	4	1.44849e-06	1.412e-06	1.24698e-06	6.67507e-09	Odocoileus_002255, Odocoileus_010525, Odocoileus_019619, Odocoileus_020310
GO:0043087	BP	e	regulation of GTPase activity	4/170	4/28017	1.30848e-09	5	4	1.44849e-06	1.412e-06	1.24698e-06	6.67507e-09	Odocoileus_002255, Odocoileus_003624, Odocoileus_012271, Odocoileus_023460
GO:0042592	BP	e	homeostatic process	4/170	4/28017	1.30848e-09	1	4	1.44849e-06	1.412e-06	1.24698e-06	6.67507e-09	Odocoileus_001215, Odocoileus_001290, Odocoileus_007878, Odocoileus_008154
GO:0019725	BP	e	cellular homeostasis	4/170	4/28017	1.30848e-09	2	4	1.44849e-06	1.412e-06	1.24698e-06	6.67507e-09	Odocoileus_001215, Odocoileus_001290, Odocoileus_007878, Odocoileus_008154
GO:0010243	BP	e	response to organonitrogen compound	4/170	4/28017	1.30848e-09	4	4	1.44849e-06	1.412e-06	1.24698e-06	6.67507e-09	Odocoileus_000381, Odocoileus_000384, Odocoileus_022226, Odocoileus_025827
GO:0016485	BP	e	protein processing	4/170	4/28017	1.30848e-09	6	4	1.44849e-06	1.412e-06	1.24698e-06	6.67507e-09	Odocoileus_002286, Odocoileus_009014, Odocoileus_010625, Odocoileus_024967
GO:0030258	BP	e	lipid modification	4/170	4/28017	1.30848e-09	5	4	1.44849e-06	1.412e-06	1.24698e-06	6.67507e-09	Odocoileus_006245, Odocoileus_008298, Odocoileus_010625, Odocoileus_025446
GO:0005975	BP	e	carbohydrate metabolic process	4/170	4/28017	1.30848e-09	3	4	1.44849e-06	1.412e-06	1.24698e-06	6.67507e-09	Odocoileus_006245, Odocoileus_021921, Odocoileus_024966, Odocoileus_025446
GO:0043632	BP	e	modification-dependent macromolecule catabolic process	4/170	4/28017	1.30848e-09	5	4	1.44849e-06	1.412e-06	1.24698e-06	6.67507e-09	Odocoileus_000381, Odocoileus_006245, Odocoileus_010732, Odocoileus_022226
GO:0051049	BP	e	regulation of transport	4/170	4/28017	1.30848e-09	4	4	1.44849e-06	1.412e-06	1.24698e-06	6.67507e-09	Odocoileus_000455, Odocoileus_006245, Odocoileus_009014, Odocoileus_010594
GO:0006511	BP	e	ubiquitin-dependent protein catabolic process	4/170	4/28017	1.30848e-09	8	4	1.44849e-06	1.412e-06	1.24698e-06	6.67507e-09	Odocoileus_000381, Odocoileus_006245, Odocoileus_010732, Odocoileus_022226
GO:0010647	BP	e	positive regulation of cell communication	4/170	4/28017	1.30848e-09	5	4	1.44849e-06	1.412e-06	1.24698e-06	6.67507e-09	Odocoileus_000384, Odocoileus_001225, Odocoileus_003349, Odocoileus_006245
GO:0042981	BP	e	regulation of apoptotic process	4/170	4/28017	1.30848e-09	5	4	1.44849e-06	1.412e-06	1.24698e-06	6.67507e-09	Odocoileus_005753, Odocoileus_006245, Odocoileus_010625, Odocoileus_021789
GO:0019637	BP	e	organophosphate metabolic process	4/170	4/28017	1.30848e-09	4	4	1.44849e-06	1.412e-06	1.24698e-06	6.67507e-09	Odocoileus_006245, Odocoileus_010267, Odocoileus_010625, Odocoileus_022372
GO:0007167	BP	e	enzyme-linked receptor protein signaling pathway	4/170	4/28017	1.30848e-09	6	4	1.44849e-06	1.412e-06	1.24698e-06	6.67507e-09	Odocoileus_006488, Odocoileus_019619, Odocoileus_021592, Odocoileus_022393
GO:0110053	BP	e	regulation of actin filament organization	4/170	4/28017	1.30848e-09	8	4	1.44849e-06	1.412e-06	1.24698e-06	6.67507e-09	Odocoileus_001176, Odocoileus_006245, Odocoileus_009014, Odocoileus_010732
GO:0007346	BP	e	regulation of mitotic cell cycle	4/170	4/28017	1.30848e-09	5	4	1.44849e-06	1.412e-06	1.24698e-06	6.67507e-09	Odocoileus_002352, Odocoileus_006245, Odocoileus_006475, Odocoileus_009014
GO:0008283	BP	e	cell population proliferation	4/170	4/28017	1.30848e-09	2	4	1.44849e-06	1.412e-06	1.24698e-06	6.67507e-09	Odocoileus_002255, Odocoileus_010525, Odocoileus_019619, Odocoileus_020310
GO:0009653	BP	e	anatomical structure morphogenesis	4/170	4/28017	1.30848e-09	2	4	1.44849e-06	1.412e-06	1.24698e-06	6.67507e-09	Odocoileus_002255, Odocoileus_019161, Odocoileus_020767, Odocoileus_020822
GO:0006421	BP	e	asparaginyl-tRNA aminoacylation	4/170	4/28017	1.30848e-09	11	4	1.44849e-06	1.412e-06	1.24698e-06	6.67507e-09	Odocoileus_007513, Odocoileus_009014, Odocoileus_021093, Odocoileus_021094
GO:0031347	BP	e	regulation of defense response	4/170	4/28017	1.30848e-09	5	4	1.44849e-06	1.412e-06	1.24698e-06	6.67507e-09	Odocoileus_009263, Odocoileus_010192, Odocoileus_010267, Odocoileus_012086
GO:0019438	BP	e	aromatic compound biosynthetic process	4/170	4/28017	1.30848e-09	4	4	1.44849e-06	1.412e-06	1.24698e-06	6.67507e-09	Odocoileus_000569, Odocoileus_006382, Odocoileus_007342, Odocoileus_022372
GO:0051726	BP	e	regulation of cell cycle	4/170	4/28017	1.30848e-09	4	4	1.44849e-06	1.412e-06	1.24698e-06	6.67507e-09	Odocoileus_002352, Odocoileus_006245, Odocoileus_006475, Odocoileus_009014
GO:0023056	BP	e	positive regulation of signaling	4/170	4/28017	1.30848e-09	4	4	1.44849e-06	1.412e-06	1.24698e-06	6.67507e-09	Odocoileus_000384, Odocoileus_001225, Odocoileus_003349, Odocoileus_006245
GO:0055080	BP	e	monoatomic cation homeostasis	4/170	4/28017	1.30848e-09	4	4	1.44849e-06	1.412e-06	1.24698e-06	6.67507e-09	Odocoileus_001215, Odocoileus_001290, Odocoileus_007878, Odocoileus_008154
GO:0050801	BP	e	monoatomic ion homeostasis	4/170	4/28017	1.30848e-09	3	4	1.44849e-06	1.412e-06	1.24698e-06	6.67507e-09	Odocoileus_001215, Odocoileus_001290, Odocoileus_007878, Odocoileus_008154
GO:1902903	BP	e	regulation of supramolecular fiber organization	4/170	4/28017	1.30848e-09	5	4	1.44849e-06	1.412e-06	1.24698e-06	6.67507e-09	Odocoileus_001176, Odocoileus_006245, Odocoileus_009014, Odocoileus_010732
GO:0019941	BP	e	modification-dependent protein catabolic process	4/170	4/28017	1.30848e-09	7	4	1.44849e-06	1.412e-06	1.24698e-06	6.67507e-09	Odocoileus_000381, Odocoileus_006245, Odocoileus_010732, Odocoileus_022226
GO:0043603	BP	e	amide metabolic process	4/170	4/28017	1.30848e-09	3	4	1.44849e-06	1.412e-06	1.24698e-06	6.67507e-09	Odocoileus_006245, Odocoileus_010625, Odocoileus_021907, Odocoileus_022329
GO:0051604	BP	e	protein maturation	4/170	4/28017	1.30848e-09	5	4	1.44849e-06	1.412e-06	1.24698e-06	6.67507e-09	Odocoileus_002286, Odocoileus_009014, Odocoileus_010625, Odocoileus_024967
GO:0043038	BP	e	amino acid activation	4/170	4/28017	1.30848e-09	7	4	1.44849e-06	1.412e-06	1.24698e-06	6.67507e-09	Odocoileus_007513, Odocoileus_009014, Odocoileus_021093, Odocoileus_021094
GO:0032535	BP	e	regulation of cellular component size	4/170	4/28017	1.30848e-09	4	4	1.44849e-06	1.412e-06	1.24698e-06	6.67507e-09	Odocoileus_001176, Odocoileus_006245, Odocoileus_008154, Odocoileus_010732
GO:0032956	BP	e	regulation of actin cytoskeleton organization	4/170	4/28017	1.30848e-09	7	4	1.44849e-06	1.412e-06	1.24698e-06	6.67507e-09	Odocoileus_001176, Odocoileus_006245, Odocoileus_009014, Odocoileus_010732
GO:0072657	BP	e	protein localization to membrane	4/170	4/28017	1.30848e-09	5	4	1.44849e-06	1.412e-06	1.24698e-06	6.67507e-09	Odocoileus_000455, Odocoileus_006245, Odocoileus_009263, Odocoileus_010368
GO:0023052	BP	e	signaling	4/170	4/28017	1.30848e-09	3	4	1.44849e-06	1.412e-06	1.24698e-06	6.67507e-09	Odocoileus_019552, Odocoileus_021915, Odocoileus_022329, Odocoileus_027264
GO:0010498	BP	e	proteasomal protein catabolic process	4/170	4/28017	1.30848e-09	7	4	1.44849e-06	1.412e-06	1.24698e-06	6.67507e-09	Odocoileus_000381, Odocoileus_006245, Odocoileus_010732, Odocoileus_022226
GO:0007169	BP	e	transmembrane receptor protein tyrosine kinase signaling pathway	4/170	4/28017	1.30848e-09	7	4	1.44849e-06	1.412e-06	1.24698e-06	6.67507e-09	Odocoileus_006488, Odocoileus_019619, Odocoileus_021592, Odocoileus_022393
GO:0009891	BP	e	positive regulation of biosynthetic process	4/170	4/28017	1.30848e-09	5	4	1.44849e-06	1.412e-06	1.24698e-06	6.67507e-09	Odocoileus_000178, Odocoileus_006245, Odocoileus_006382, Odocoileus_020822
GO:0050776	BP	e	regulation of immune response	4/170	4/28017	1.30848e-09	4	4	1.44849e-06	1.412e-06	1.24698e-06	6.67507e-09	Odocoileus_009263, Odocoileus_010192, Odocoileus_010267, Odocoileus_022393
GO:0010557	BP	e	positive regulation of macromolecule biosynthetic process	4/170	4/28017	1.30848e-09	7	4	1.44849e-06	1.412e-06	1.24698e-06	6.67507e-09	Odocoileus_000178, Odocoileus_006245, Odocoileus_006382, Odocoileus_020822
GO:0032101	BP	e	regulation of response to external stimulus	4/170	4/28017	1.30848e-09	4	4	1.44849e-06	1.412e-06	1.24698e-06	6.67507e-09	Odocoileus_009263, Odocoileus_010192, Odocoileus_010267, Odocoileus_012086
GO:0009894	BP	e	regulation of catabolic process	4/170	4/28017	1.30848e-09	4	4	1.44849e-06	1.412e-06	1.24698e-06	6.67507e-09	Odocoileus_000381, Odocoileus_000384, Odocoileus_010192, Odocoileus_010732
GO:0098609	BP	e	cell-cell adhesion	4/170	4/28017	1.30848e-09	3	4	1.44849e-06	1.412e-06	1.24698e-06	6.67507e-09	Odocoileus_005581, Odocoileus_020767, Odocoileus_020843, Odocoileus_024836
GO:0043161	BP	e	proteasome-mediated ubiquitin-dependent protein catabolic process	4/170	4/28017	1.30848e-09	9	4	1.44849e-06	1.412e-06	1.24698e-06	6.67507e-09	Odocoileus_000381, Odocoileus_006245, Odocoileus_010732, Odocoileus_022226
GO:0006418	BP	e	tRNA aminoacylation for protein translation	4/170	4/28017	1.30848e-09	10	4	1.44849e-06	1.412e-06	1.24698e-06	6.67507e-09	Odocoileus_007513, Odocoileus_009014, Odocoileus_021093, Odocoileus_021094
GO:0051668	BP	e	localization within membrane	4/170	4/28017	1.30848e-09	3	4	1.44849e-06	1.412e-06	1.24698e-06	6.67507e-09	Odocoileus_000455, Odocoileus_006245, Odocoileus_009263, Odocoileus_010368
GO:0030163	BP	e	protein catabolic process	4/170	4/28017	1.30848e-09	5	4	1.44849e-06	1.412e-06	1.24698e-06	6.67507e-09	Odocoileus_000381, Odocoileus_006245, Odocoileus_010732, Odocoileus_022226
GO:0051240	BP	e	positive regulation of multicellular organismal process	4/170	4/28017	1.30848e-09	4	4	1.44849e-06	1.412e-06	1.24698e-06	6.67507e-09	Odocoileus_006245, Odocoileus_010192, Odocoileus_010594, Odocoileus_019161
GO:0044283	BP	e	small molecule biosynthetic process	3/170	3/28017	2.19496e-07	3	3	0.000242982	0.000236861	0.000195351	7.96662e-07	Odocoileus_007342, Odocoileus_022144, Odocoileus_024966
GO:0030003	BP	e	intracellular monoatomic cation homeostasis	3/170	3/28017	2.19496e-07	5	3	0.000242982	0.000236861	0.000195351	7.96662e-07	Odocoileus_001215, Odocoileus_001290, Odocoileus_007878
GO:0045935	BP	e	positive regulation of nucleobase-containing compound metabolic process	3/170	3/28017	2.19496e-07	6	3	0.000242982	0.000236861	0.000195351	7.96662e-07	Odocoileus_006245, Odocoileus_006382, Odocoileus_020822
GO:0044282	BP	e	small molecule catabolic process	3/170	3/28017	2.19496e-07	3	3	0.000242982	0.000236861	0.000195351	7.96662e-07	Odocoileus_008298, Odocoileus_010625, Odocoileus_019322
GO:0045893	BP	e	positive regulation of DNA-templated transcription	3/170	3/28017	2.19496e-07	9	3	0.000242982	0.000236861	0.000195351	7.96662e-07	Odocoileus_006245, Odocoileus_006382, Odocoileus_020822
GO:0022618	BP	e	protein-RNA complex assembly	3/170	3/28017	2.19496e-07	6	3	0.000242982	0.000236861	0.000195351	7.96662e-07	Odocoileus_000178, Odocoileus_006245, Odocoileus_022329
GO:0007275	BP	e	multicellular organism development	3/170	3/28017	2.19496e-07	3	3	0.000242982	0.000236861	0.000195351	7.96662e-07	Odocoileus_006488, Odocoileus_020767, Odocoileus_021592
GO:0071824	BP	e	protein-DNA complex organization	3/170	3/28017	2.19496e-07	5	3	0.000242982	0.000236861	0.000195351	7.96662e-07	Odocoileus_000569, Odocoileus_000987, Odocoileus_021337
GO:0043254	BP	e	regulation of protein-containing complex assembly	3/170	3/28017	2.19496e-07	5	3	0.000242982	0.000236861	0.000195351	7.96662e-07	Odocoileus_001176, Odocoileus_006245, Odocoileus_010732
GO:0009968	BP	e	negative regulation of signal transduction	3/170	3/28017	2.19496e-07	6	3	0.000242982	0.000236861	0.000195351	7.96662e-07	Odocoileus_005753, Odocoileus_014765, Odocoileus_019458
GO:0007188	BP	e	adenylate cyclase-modulating G protein-coupled receptor signaling pathway	3/170	3/28017	2.19496e-07	6	3	0.000242982	0.000236861	0.000195351	7.96662e-07	Odocoileus_003349, Odocoileus_006245, Odocoileus_009263
GO:0098742	BP	e	cell-cell adhesion via plasma-membrane adhesion molecules	3/170	3/28017	2.19496e-07	4	3	0.000242982	0.000236861	0.000195351	7.96662e-07	Odocoileus_020767, Odocoileus_020843, Odocoileus_024836
GO:0010648	BP	e	negative regulation of cell communication	3/170	3/28017	2.19496e-07	5	3	0.000242982	0.000236861	0.000195351	7.96662e-07	Odocoileus_005753, Odocoileus_014765, Odocoileus_019458
GO:0070588	BP	e	calcium ion transmembrane transport	3/170	3/28017	2.19496e-07	8	3	0.000242982	0.000236861	0.000195351	7.96662e-07	Odocoileus_007504, Odocoileus_007878, Odocoileus_009263
GO:0051254	BP	e	positive regulation of RNA metabolic process	3/170	3/28017	2.19496e-07	7	3	0.000242982	0.000236861	0.000195351	7.96662e-07	Odocoileus_006245, Odocoileus_006382, Odocoileus_020822
GO:0009607	BP	e	response to biotic stimulus	3/170	3/28017	2.19496e-07	2	3	0.000242982	0.000236861	0.000195351	7.96662e-07	Odocoileus_007907, Odocoileus_010267, Odocoileus_022393
GO:0044419	BP	e	biological process involved in interspecies interaction between organisms	3/170	3/28017	2.19496e-07	1	3	0.000242982	0.000236861	0.000195351	7.96662e-07	Odocoileus_007907, Odocoileus_010267, Odocoileus_022393
GO:0008064	BP	e	regulation of actin polymerization or depolymerization	3/170	3/28017	2.19496e-07	9	3	0.000242982	0.000236861	0.000195351	7.96662e-07	Odocoileus_001176, Odocoileus_006245, Odocoileus_010732
GO:0034654	BP	e	nucleobase-containing compound biosynthetic process	3/170	3/28017	2.19496e-07	5	3	0.000242982	0.000236861	0.000195351	7.96662e-07	Odocoileus_000569, Odocoileus_006382, Odocoileus_022372
GO:0009967	BP	e	positive regulation of signal transduction	3/170	3/28017	2.19496e-07	6	3	0.000242982	0.000236861	0.000195351	7.96662e-07	Odocoileus_000384, Odocoileus_001225, Odocoileus_006245
GO:0098542	BP	e	defense response to other organism	3/170	3/28017	2.19496e-07	5	3	0.000242982	0.000236861	0.000195351	7.96662e-07	Odocoileus_007907, Odocoileus_010267, Odocoileus_022393
GO:0051707	BP	e	response to other organism	3/170	3/28017	2.19496e-07	4	3	0.000242982	0.000236861	0.000195351	7.96662e-07	Odocoileus_007907, Odocoileus_010267, Odocoileus_022393
GO:0055082	BP	e	intracellular chemical homeostasis	3/170	3/28017	2.19496e-07	3	3	0.000242982	0.000236861	0.000195351	7.96662e-07	Odocoileus_001215, Odocoileus_001290, Odocoileus_007878
GO:0032271	BP	e	regulation of protein polymerization	3/170	3/28017	2.19496e-07	6	3	0.000242982	0.000236861	0.000195351	7.96662e-07	Odocoileus_001176, Odocoileus_006245, Odocoileus_010732
GO:0055086	BP	e	nucleobase-containing small molecule metabolic process	3/170	3/28017	2.19496e-07	5	3	0.000242982	0.000236861	0.000195351	7.96662e-07	Odocoileus_010267, Odocoileus_022144, Odocoileus_022372
GO:0051246	BP	e	regulation of protein metabolic process	3/170	3/28017	2.19496e-07	5	3	0.000242982	0.000236861	0.000195351	7.96662e-07	Odocoileus_000178, Odocoileus_010192, Odocoileus_010732
GO:0043043	BP	e	peptide biosynthetic process	3/170	3/28017	2.19496e-07	6	3	0.000242982	0.000236861	0.000195351	7.96662e-07	Odocoileus_006245, Odocoileus_021907, Odocoileus_022329
GO:0006820	BP	e	monoatomic anion transport	3/170	3/28017	2.19496e-07	5	3	0.000242982	0.000236861	0.000195351	7.96662e-07	Odocoileus_001176, Odocoileus_006245, Odocoileus_008154
GO:1901987	BP	e	regulation of cell cycle phase transition	3/170	3/28017	2.19496e-07	6	3	0.000242982	0.000236861	0.000195351	7.96662e-07	Odocoileus_002352, Odocoileus_006475, Odocoileus_009014
GO:0099536	BP	e	synaptic signaling	3/170	3/28017	2.19496e-07	5	3	0.000242982	0.000236861	0.000195351	7.96662e-07	Odocoileus_021915, Odocoileus_022329, Odocoileus_027264
GO:0051345	BP	e	positive regulation of hydrolase activity	3/170	3/28017	2.19496e-07	5	3	0.000242982	0.000236861	0.000195351	7.96662e-07	Odocoileus_002255, Odocoileus_003624, Odocoileus_012271
GO:0051338	BP	e	regulation of transferase activity	3/170	3/28017	2.19496e-07	4	3	0.000242982	0.000236861	0.000195351	7.96662e-07	Odocoileus_006488, Odocoileus_010732, Odocoileus_021592
GO:0002684	BP	e	positive regulation of immune system process	3/170	3/28017	2.19496e-07	4	3	0.000242982	0.000236861	0.000195351	7.96662e-07	Odocoileus_009263, Odocoileus_010594, Odocoileus_022393
GO:0044087	BP	e	regulation of cellular component biogenesis	3/170	3/28017	2.19496e-07	4	3	0.000242982	0.000236861	0.000195351	7.96662e-07	Odocoileus_001176, Odocoileus_006245, Odocoileus_010732
GO:1902680	BP	e	positive regulation of RNA biosynthetic process	3/170	3/28017	2.19496e-07	8	3	0.000242982	0.000236861	0.000195351	7.96662e-07	Odocoileus_006245, Odocoileus_006382, Odocoileus_020822
GO:0006259	BP	e	DNA metabolic process	3/170	3/28017	2.19496e-07	6	3	0.000242982	0.000236861	0.000195351	7.96662e-07	Odocoileus_002352, Odocoileus_008665, Odocoileus_021337
GO:0034470	BP	e	ncRNA processing	3/170	3/28017	2.19496e-07	8	3	0.000242982	0.000236861	0.000195351	7.96662e-07	Odocoileus_001768, Odocoileus_009014, Odocoileus_010192
GO:0007093	BP	e	mitotic cell cycle checkpoint signaling	3/170	3/28017	2.19496e-07	9	3	0.000242982	0.000236861	0.000195351	7.96662e-07	Odocoileus_002352, Odocoileus_006475, Odocoileus_009014
GO:0098771	BP	e	inorganic ion homeostasis	3/170	3/28017	2.19496e-07	3	3	0.000242982	0.000236861	0.000195351	7.96662e-07	Odocoileus_001290, Odocoileus_007878, Odocoileus_008154
GO:0006869	BP	e	lipid transport	3/170	3/28017	2.19496e-07	5	3	0.000242982	0.000236861	0.000195351	7.96662e-07	Odocoileus_006245, Odocoileus_010625, Odocoileus_025491
GO:0060765	BP	e	regulation of androgen receptor signaling pathway	3/170	3/28017	2.19496e-07	7	3	0.000242982	0.000236861	0.000195351	7.96662e-07	Odocoileus_005952, Odocoileus_005953, Odocoileus_005955
GO:0002376	BP	e	immune system process	3/170	3/28017	2.19496e-07	1	3	0.000242982	0.000236861	0.000195351	7.96662e-07	Odocoileus_007907, Odocoileus_009263, Odocoileus_022393
GO:1903047	BP	e	mitotic cell cycle process	3/170	3/28017	2.19496e-07	3	3	0.000242982	0.000236861	0.000195351	7.96662e-07	Odocoileus_002352, Odocoileus_006475, Odocoileus_009014
GO:0006913	BP	e	nucleocytoplasmic transport	3/170	3/28017	2.19496e-07	6	3	0.000242982	0.000236861	0.000195351	7.96662e-07	Odocoileus_010702, Odocoileus_010732, Odocoileus_025133
GO:0048731	BP	e	system development	3/170	3/28017	2.19496e-07	3	3	0.000242982	0.000236861	0.000195351	7.96662e-07	Odocoileus_006245, Odocoileus_019161, Odocoileus_025134
GO:0006873	BP	e	intracellular monoatomic ion homeostasis	3/170	3/28017	2.19496e-07	4	3	0.000242982	0.000236861	0.000195351	7.96662e-07	Odocoileus_001215, Odocoileus_001290, Odocoileus_007878
GO:0033143	BP	e	regulation of intracellular steroid hormone receptor signaling pathway	3/170	3/28017	2.19496e-07	6	3	0.000242982	0.000236861	0.000195351	7.96662e-07	Odocoileus_005952, Odocoileus_005953, Odocoileus_005955
GO:0097435	BP	e	supramolecular fiber organization	3/170	3/28017	2.19496e-07	4	3	0.000242982	0.000236861	0.000195351	7.96662e-07	Odocoileus_010525, Odocoileus_010804, Odocoileus_021041
GO:0006955	BP	e	immune response	3/170	3/28017	2.19496e-07	2	3	0.000242982	0.000236861	0.000195351	7.96662e-07	Odocoileus_007907, Odocoileus_009263, Odocoileus_022393
GO:0043207	BP	e	response to external biotic stimulus	3/170	3/28017	2.19496e-07	3	3	0.000242982	0.000236861	0.000195351	7.96662e-07	Odocoileus_007907, Odocoileus_010267, Odocoileus_022393
GO:0006816	BP	e	calcium ion transport	3/170	3/28017	2.19496e-07	7	3	0.000242982	0.000236861	0.000195351	7.96662e-07	Odocoileus_007504, Odocoileus_007878, Odocoileus_009263
GO:0016054	BP	e	organic acid catabolic process	3/170	3/28017	2.19496e-07	4	3	0.000242982	0.000236861	0.000195351	7.96662e-07	Odocoileus_008298, Odocoileus_010625, Odocoileus_019322
GO:0045930	BP	e	negative regulation of mitotic cell cycle	3/170	3/28017	2.19496e-07	6	3	0.000242982	0.000236861	0.000195351	7.96662e-07	Odocoileus_002352, Odocoileus_006475, Odocoileus_009014
GO:0050684	BP	e	regulation of mRNA processing	3/170	3/28017	2.19496e-07	8	3	0.000242982	0.000236861	0.000195351	7.96662e-07	Odocoileus_005952, Odocoileus_005953, Odocoileus_005955
GO:0071310	BP	e	cellular response to organic substance	3/170	3/28017	2.19496e-07	4	3	0.000242982	0.000236861	0.000195351	7.96662e-07	Odocoileus_000384, Odocoileus_009263, Odocoileus_025827
GO:0007156	BP	e	homophilic cell adhesion via plasma membrane adhesion molecules	3/170	3/28017	2.19496e-07	5	3	0.000242982	0.000236861	0.000195351	7.96662e-07	Odocoileus_020767, Odocoileus_020843, Odocoileus_024836
GO:0051169	BP	e	nuclear transport	3/170	3/28017	2.19496e-07	5	3	0.000242982	0.000236861	0.000195351	7.96662e-07	Odocoileus_010702, Odocoileus_010732, Odocoileus_025133
GO:1901988	BP	e	negative regulation of cell cycle phase transition	3/170	3/28017	2.19496e-07	7	3	0.000242982	0.000236861	0.000195351	7.96662e-07	Odocoileus_002352, Odocoileus_006475, Odocoileus_009014
GO:0007017	BP	e	microtubule-based process	3/170	3/28017	2.19496e-07	2	3	0.000242982	0.000236861	0.000195351	7.96662e-07	Odocoileus_009014, Odocoileus_010525, Odocoileus_019173
GO:0010948	BP	e	negative regulation of cell cycle process	3/170	3/28017	2.19496e-07	6	3	0.000242982	0.000236861	0.000195351	7.96662e-07	Odocoileus_002352, Odocoileus_006475, Odocoileus_009014
GO:0071826	BP	e	protein-RNA complex organization	3/170	3/28017	2.19496e-07	5	3	0.000242982	0.000236861	0.000195351	7.96662e-07	Odocoileus_000178, Odocoileus_006245, Odocoileus_022329
GO:0051347	BP	e	positive regulation of transferase activity	3/170	3/28017	2.19496e-07	5	3	0.000242982	0.000236861	0.000195351	7.96662e-07	Odocoileus_006488, Odocoileus_010732, Odocoileus_021592
GO:0030832	BP	e	regulation of actin filament length	3/170	3/28017	2.19496e-07	8	3	0.000242982	0.000236861	0.000195351	7.96662e-07	Odocoileus_001176, Odocoileus_006245, Odocoileus_010732
GO:0051276	BP	e	chromosome organization	3/170	3/28017	2.19496e-07	5	3	0.000242982	0.000236861	0.000195351	7.96662e-07	Odocoileus_009014, Odocoileus_019829, Odocoileus_021337
GO:0007005	BP	e	mitochondrion organization	3/170	3/28017	2.19496e-07	5	3	0.000242982	0.000236861	0.000195351	7.96662e-07	Odocoileus_000175, Odocoileus_006245, Odocoileus_025491
GO:0060341	BP	e	regulation of cellular localization	3/170	3/28017	2.19496e-07	4	3	0.000242982	0.000236861	0.000195351	7.96662e-07	Odocoileus_000455, Odocoileus_009014, Odocoileus_019173
GO:0030833	BP	e	regulation of actin filament polymerization	3/170	3/28017	2.19496e-07	10	3	0.000242982	0.000236861	0.000195351	7.96662e-07	Odocoileus_001176, Odocoileus_006245, Odocoileus_010732
GO:0070925	BP	e	organelle assembly	3/170	3/28017	2.19496e-07	5	3	0.000242982	0.000236861	0.000195351	7.96662e-07	Odocoileus_000381, Odocoileus_019829, Odocoileus_020310
GO:0043547	BP	e	positive regulation of GTPase activity	3/170	3/28017	2.19496e-07	6	3	0.000242982	0.000236861	0.000195351	7.96662e-07	Odocoileus_002255, Odocoileus_003624, Odocoileus_012271
GO:0000075	BP	e	cell cycle checkpoint signaling	3/170	3/28017	2.19496e-07	8	3	0.000242982	0.000236861	0.000195351	7.96662e-07	Odocoileus_002352, Odocoileus_006475, Odocoileus_009014
GO:0043687	BP	e	post-translational protein modification	3/170	3/28017	2.19496e-07	6	3	0.000242982	0.000236861	0.000195351	7.96662e-07	Odocoileus_007894, Odocoileus_011924, Odocoileus_013880
GO:0051247	BP	e	positive regulation of protein metabolic process	3/170	3/28017	2.19496e-07	6	3	0.000242982	0.000236861	0.000195351	7.96662e-07	Odocoileus_000178, Odocoileus_010192, Odocoileus_010732
GO:0007608	BP	e	sensory perception of smell	3/170	3/28017	2.19496e-07	6	3	0.000242982	0.000236861	0.000195351	7.96662e-07	Odocoileus_006264, Odocoileus_006265, Odocoileus_023408
GO:0031329	BP	e	regulation of cellular catabolic process	3/170	3/28017	2.19496e-07	5	3	0.000242982	0.000236861	0.000195351	7.96662e-07	Odocoileus_000381, Odocoileus_000384, Odocoileus_010192
GO:0070647	BP	e	protein modification by small protein conjugation or removal	3/170	3/28017	2.19496e-07	7	3	0.000242982	0.000236861	0.000195351	7.96662e-07	Odocoileus_007894, Odocoileus_011924, Odocoileus_013880
GO:0043604	BP	e	amide biosynthetic process	3/170	3/28017	2.19496e-07	5	3	0.000242982	0.000236861	0.000195351	7.96662e-07	Odocoileus_006245, Odocoileus_021907, Odocoileus_022329
GO:0050793	BP	e	regulation of developmental process	3/170	3/28017	2.19496e-07	3	3	0.000242982	0.000236861	0.000195351	7.96662e-07	Odocoileus_010192, Odocoileus_010804, Odocoileus_019161
GO:0023057	BP	e	negative regulation of signaling	3/170	3/28017	2.19496e-07	4	3	0.000242982	0.000236861	0.000195351	7.96662e-07	Odocoileus_005753, Odocoileus_014765, Odocoileus_019458
GO:0120036	BP	e	plasma membrane bounded cell projection organization	3/170	3/28017	2.19496e-07	5	3	0.000242982	0.000236861	0.000195351	7.96662e-07	Odocoileus_010525, Odocoileus_019619, Odocoileus_020310
GO:0046395	BP	e	carboxylic acid catabolic process	3/170	3/28017	2.19496e-07	6	3	0.000242982	0.000236861	0.000195351	7.96662e-07	Odocoileus_008298, Odocoileus_010625, Odocoileus_019322
GO:0051056	BP	e	regulation of small GTPase mediated signal transduction	3/170	3/28017	2.19496e-07	7	3	0.000242982	0.000236861	0.000195351	7.96662e-07	Odocoileus_001176, Odocoileus_006245, Odocoileus_010732
GO:0070887	BP	e	cellular response to chemical stimulus	3/170	3/28017	2.19496e-07	3	3	0.000242982	0.000236861	0.000195351	7.96662e-07	Odocoileus_000384, Odocoileus_009263, Odocoileus_025827
GO:0045786	BP	e	negative regulation of cell cycle	3/170	3/28017	2.19496e-07	5	3	0.000242982	0.000236861	0.000195351	7.96662e-07	Odocoileus_002352, Odocoileus_006475, Odocoileus_009014
GO:0048513	BP	e	animal organ development	3/170	3/28017	2.19496e-07	3	3	0.000242982	0.000236861	0.000195351	7.96662e-07	Odocoileus_002684, Odocoileus_019161, Odocoileus_022329
GO:1903311	BP	e	regulation of mRNA metabolic process	3/170	3/28017	2.19496e-07	7	3	0.000242982	0.000236861	0.000195351	7.96662e-07	Odocoileus_005952, Odocoileus_005953, Odocoileus_005955
GO:0006412	BP	e	translation	3/170	3/28017	2.19496e-07	7	3	0.000242982	0.000236861	0.000195351	7.96662e-07	Odocoileus_006245, Odocoileus_021907, Odocoileus_022329
GO:0010564	BP	e	regulation of cell cycle process	3/170	3/28017	2.19496e-07	5	3	0.000242982	0.000236861	0.000195351	7.96662e-07	Odocoileus_002352, Odocoileus_006475, Odocoileus_009014
GO:1901605	BP	e	alpha-amino acid metabolic process	3/170	3/28017	2.19496e-07	7	3	0.000242982	0.000236861	0.000195351	7.96662e-07	Odocoileus_019322, Odocoileus_022144, Odocoileus_023391
GO:0003012	BP	e	muscle system process	2/170	2/28017	3.66023e-05	3	2	0.0405187	0.039498	0.029355	8.88568e-05	Odocoileus_006245, Odocoileus_022329
GO:0006351	BP	e	DNA-templated transcription	2/170	2/28017	3.66023e-05	8	2	0.0405187	0.039498	0.029355	8.88568e-05	Odocoileus_000569, Odocoileus_006382
GO:0045937	BP	e	positive regulation of phosphate metabolic process	2/170	2/28017	3.66023e-05	7	2	0.0405187	0.039498	0.029355	8.88568e-05	Odocoileus_006488, Odocoileus_021592
GO:1902750	BP	e	negative regulation of cell cycle G2/M phase transition	2/170	2/28017	3.66023e-05	8	2	0.0405187	0.039498	0.029355	8.88568e-05	Odocoileus_002352, Odocoileus_006475
GO:0048869	BP	e	cellular developmental process	2/170	2/28017	3.66023e-05	2	2	0.0405187	0.039498	0.029355	8.88568e-05	Odocoileus_019161, Odocoileus_022393
GO:0034976	BP	e	response to endoplasmic reticulum stress	2/170	2/28017	3.66023e-05	4	2	0.0405187	0.039498	0.029355	8.88568e-05	Odocoileus_000381, Odocoileus_022226
GO:0015711	BP	e	organic anion transport	2/170	2/28017	3.66023e-05	5	2	0.0405187	0.039498	0.029355	8.88568e-05	Odocoileus_005251, Odocoileus_025491
GO:0016071	BP	e	mRNA metabolic process	2/170	2/28017	3.66023e-05	7	2	0.0405187	0.039498	0.029355	8.88568e-05	Odocoileus_003128, Odocoileus_006245
GO:0005996	BP	e	monosaccharide metabolic process	2/170	2/28017	3.66023e-05	4	2	0.0405187	0.039498	0.029355	8.88568e-05	Odocoileus_006245, Odocoileus_024966
GO:0033674	BP	e	positive regulation of kinase activity	2/170	2/28017	3.66023e-05	9	2	0.0405187	0.039498	0.029355	8.88568e-05	Odocoileus_006488, Odocoileus_021592
GO:0032774	BP	e	RNA biosynthetic process	2/170	2/28017	3.66023e-05	7	2	0.0405187	0.039498	0.029355	8.88568e-05	Odocoileus_000569, Odocoileus_006382
GO:0017004	BP	e	cytochrome complex assembly	2/170	2/28017	3.66023e-05	6	2	0.0405187	0.039498	0.029355	8.88568e-05	Odocoileus_000052, Odocoileus_007509
GO:0090407	BP	e	organophosphate biosynthetic process	2/170	2/28017	3.66023e-05	5	2	0.0405187	0.039498	0.029355	8.88568e-05	Odocoileus_006245, Odocoileus_022372
GO:0044818	BP	e	mitotic G2/M transition checkpoint	2/170	2/28017	3.66023e-05	10	2	0.0405187	0.039498	0.029355	8.88568e-05	Odocoileus_002352, Odocoileus_006475
GO:1901991	BP	e	negative regulation of mitotic cell cycle phase transition	2/170	2/28017	3.66023e-05	8	2	0.0405187	0.039498	0.029355	8.88568e-05	Odocoileus_002352, Odocoileus_006475
GO:0009100	BP	e	glycoprotein metabolic process	2/170	2/28017	3.66023e-05	5	2	0.0405187	0.039498	0.029355	8.88568e-05	Odocoileus_006245, Odocoileus_021921
GO:0010562	BP	e	positive regulation of phosphorus metabolic process	2/170	2/28017	3.66023e-05	6	2	0.0405187	0.039498	0.029355	8.88568e-05	Odocoileus_006488, Odocoileus_021592
GO:0006575	BP	e	cellular modified amino acid metabolic process	2/170	2/28017	3.66023e-05	4	2	0.0405187	0.039498	0.029355	8.88568e-05	Odocoileus_007342, Odocoileus_012356
GO:0042327	BP	e	positive regulation of phosphorylation	2/170	2/28017	3.66023e-05	8	2	0.0405187	0.039498	0.029355	8.88568e-05	Odocoileus_006488, Odocoileus_021592
GO:0070302	BP	e	regulation of stress-activated protein kinase signaling cascade	2/170	2/28017	3.66023e-05	7	2	0.0405187	0.039498	0.029355	8.88568e-05	Odocoileus_012467, Odocoileus_014765
GO:0006491	BP	e	N-glycan processing	2/170	2/28017	3.66023e-05	6	2	0.0405187	0.039498	0.029355	8.88568e-05	Odocoileus_006245, Odocoileus_021921
GO:0007018	BP	e	microtubule-based movement	2/170	2/28017	3.66023e-05	3	2	0.0405187	0.039498	0.029355	8.88568e-05	Odocoileus_009014, Odocoileus_019173
GO:0051168	BP	e	nuclear export	2/170	2/28017	3.66023e-05	7	2	0.0405187	0.039498	0.029355	8.88568e-05	Odocoileus_010732, Odocoileus_025133
GO:0042398	BP	e	cellular modified amino acid biosynthetic process	2/170	2/28017	3.66023e-05	5	2	0.0405187	0.039498	0.029355	8.88568e-05	Odocoileus_007342, Odocoileus_012356
GO:0016192	BP	e	vesicle-mediated transport	2/170	2/28017	3.66023e-05	4	2	0.0405187	0.039498	0.029355	8.88568e-05	Odocoileus_000455, Odocoileus_023460
GO:0061024	BP	e	membrane organization	2/170	2/28017	3.66023e-05	4	2	0.0405187	0.039498	0.029355	8.88568e-05	Odocoileus_000175, Odocoileus_006245
GO:0032880	BP	e	regulation of protein localization	2/170	2/28017	3.66023e-05	5	2	0.0405187	0.039498	0.029355	8.88568e-05	Odocoileus_000455, Odocoileus_019173
GO:0031570	BP	e	DNA integrity checkpoint signaling	2/170	2/28017	3.66023e-05	9	2	0.0405187	0.039498	0.029355	8.88568e-05	Odocoileus_002352, Odocoileus_006475
GO:0006366	BP	e	transcription by RNA polymerase II	2/170	2/28017	3.66023e-05	9	2	0.0405187	0.039498	0.029355	8.88568e-05	Odocoileus_000569, Odocoileus_006382
GO:0007015	BP	e	actin filament organization	2/170	2/28017	3.66023e-05	5	2	0.0405187	0.039498	0.029355	8.88568e-05	Odocoileus_010804, Odocoileus_021041
GO:2000026	BP	e	regulation of multicellular organismal development	2/170	2/28017	3.66023e-05	4	2	0.0405187	0.039498	0.029355	8.88568e-05	Odocoileus_010192, Odocoileus_019161
GO:0019220	BP	e	regulation of phosphate metabolic process	2/170	2/28017	3.66023e-05	6	2	0.0405187	0.039498	0.029355	8.88568e-05	Odocoileus_006488, Odocoileus_021592
GO:0071495	BP	e	cellular response to endogenous stimulus	2/170	2/28017	3.66023e-05	3	2	0.0405187	0.039498	0.029355	8.88568e-05	Odocoileus_000384, Odocoileus_025827
GO:0043408	BP	e	regulation of MAPK cascade	2/170	2/28017	3.66023e-05	7	2	0.0405187	0.039498	0.029355	8.88568e-05	Odocoileus_012467, Odocoileus_014765
GO:0009063	BP	e	amino acid catabolic process	2/170	2/28017	3.66023e-05	7	2	0.0405187	0.039498	0.029355	8.88568e-05	Odocoileus_010625, Odocoileus_019322
GO:0045862	BP	e	positive regulation of proteolysis	2/170	2/28017	3.66023e-05	7	2	0.0405187	0.039498	0.029355	8.88568e-05	Odocoileus_010192, Odocoileus_010732
GO:0046700	BP	e	heterocycle catabolic process	2/170	2/28017	3.66023e-05	4	2	0.0405187	0.039498	0.029355	8.88568e-05	Odocoileus_003128, Odocoileus_010267
GO:0032872	BP	e	regulation of stress-activated MAPK cascade	2/170	2/28017	3.66023e-05	8	2	0.0405187	0.039498	0.029355	8.88568e-05	Odocoileus_012467, Odocoileus_014765
GO:0044057	BP	e	regulation of system process	2/170	2/28017	3.66023e-05	4	2	0.0405187	0.039498	0.029355	8.88568e-05	Odocoileus_006245, Odocoileus_010192
GO:1901701	BP	e	cellular response to oxygen-containing compound	2/170	2/28017	3.66023e-05	4	2	0.0405187	0.039498	0.029355	8.88568e-05	Odocoileus_000384, Odocoileus_025827
GO:0006753	BP	e	nucleoside phosphate metabolic process	2/170	2/28017	3.66023e-05	6	2	0.0405187	0.039498	0.029355	8.88568e-05	Odocoileus_010267, Odocoileus_022372
GO:0007268	BP	e	chemical synaptic transmission	2/170	2/28017	3.66023e-05	8	2	0.0405187	0.039498	0.029355	8.88568e-05	Odocoileus_021915, Odocoileus_022329
GO:0099177	BP	e	regulation of trans-synaptic signaling	2/170	2/28017	3.66023e-05	5	2	0.0405187	0.039498	0.029355	8.88568e-05	Odocoileus_003349, Odocoileus_006245
GO:0051130	BP	e	positive regulation of cellular component organization	2/170	2/28017	3.66023e-05	5	2	0.0405187	0.039498	0.029355	8.88568e-05	Odocoileus_006245, Odocoileus_010594
GO:0009117	BP	e	nucleotide metabolic process	2/170	2/28017	3.66023e-05	7	2	0.0405187	0.039498	0.029355	8.88568e-05	Odocoileus_010267, Odocoileus_022372
GO:0009451	BP	e	RNA modification	2/170	2/28017	3.66023e-05	7	2	0.0405187	0.039498	0.029355	8.88568e-05	Odocoileus_009014, Odocoileus_010192
GO:0010972	BP	e	negative regulation of G2/M transition of mitotic cell cycle	2/170	2/28017	3.66023e-05	9	2	0.0405187	0.039498	0.029355	8.88568e-05	Odocoileus_002352, Odocoileus_006475
GO:0030162	BP	e	regulation of proteolysis	2/170	2/28017	3.66023e-05	6	2	0.0405187	0.039498	0.029355	8.88568e-05	Odocoileus_010192, Odocoileus_010732
GO:0042407	BP	e	cristae formation	2/170	2/28017	3.66023e-05	8	2	0.0405187	0.039498	0.029355	8.88568e-05	Odocoileus_000175, Odocoileus_006245
GO:1902749	BP	e	regulation of cell cycle G2/M phase transition	2/170	2/28017	3.66023e-05	7	2	0.0405187	0.039498	0.029355	8.88568e-05	Odocoileus_002352, Odocoileus_006475
GO:0055074	BP	e	calcium ion homeostasis	2/170	2/28017	3.66023e-05	5	2	0.0405187	0.039498	0.029355	8.88568e-05	Odocoileus_001290, Odocoileus_007878
GO:0032006	BP	e	regulation of TOR signaling	2/170	2/28017	3.66023e-05	7	2	0.0405187	0.039498	0.029355	8.88568e-05	Odocoileus_000384, Odocoileus_005753
GO:0010628	BP	e	positive regulation of gene expression	2/170	2/28017	3.66023e-05	8	2	0.0405187	0.039498	0.029355	8.88568e-05	Odocoileus_000178, Odocoileus_006245
GO:0030154	BP	e	cell differentiation	2/170	2/28017	3.66023e-05	3	2	0.0405187	0.039498	0.029355	8.88568e-05	Odocoileus_019161, Odocoileus_022393
GO:0098659	BP	e	inorganic cation import across plasma membrane	2/170	2/28017	3.66023e-05	7	2	0.0405187	0.039498	0.029355	8.88568e-05	Odocoileus_007504, Odocoileus_008154
GO:0030433	BP	e	ubiquitin-dependent ERAD pathway	2/170	2/28017	3.66023e-05	10	2	0.0405187	0.039498	0.029355	8.88568e-05	Odocoileus_000381, Odocoileus_022226
GO:0042325	BP	e	regulation of phosphorylation	2/170	2/28017	3.66023e-05	7	2	0.0405187	0.039498	0.029355	8.88568e-05	Odocoileus_006488, Odocoileus_021592
GO:0070262	BP	e	peptidyl-serine dephosphorylation	2/170	2/28017	3.66023e-05	7	2	0.0405187	0.039498	0.029355	8.88568e-05	Odocoileus_010891, Odocoileus_019661
GO:0045595	BP	e	regulation of cell differentiation	2/170	2/28017	3.66023e-05	4	2	0.0405187	0.039498	0.029355	8.88568e-05	Odocoileus_010192, Odocoileus_019161
GO:1901699	BP	e	cellular response to nitrogen compound	2/170	2/28017	3.66023e-05	4	2	0.0405187	0.039498	0.029355	8.88568e-05	Odocoileus_000384, Odocoileus_025827
GO:0032787	BP	e	monocarboxylic acid metabolic process	2/170	2/28017	3.66023e-05	6	2	0.0405187	0.039498	0.029355	8.88568e-05	Odocoileus_008298, Odocoileus_024966
GO:0006936	BP	e	muscle contraction	2/170	2/28017	3.66023e-05	4	2	0.0405187	0.039498	0.029355	8.88568e-05	Odocoileus_006245, Odocoileus_022329
GO:0060627	BP	e	regulation of vesicle-mediated transport	2/170	2/28017	3.66023e-05	5	2	0.0405187	0.039498	0.029355	8.88568e-05	Odocoileus_000455, Odocoileus_010594
GO:1901700	BP	e	response to oxygen-containing compound	2/170	2/28017	3.66023e-05	3	2	0.0405187	0.039498	0.029355	8.88568e-05	Odocoileus_000384, Odocoileus_025827
GO:0051640	BP	e	organelle localization	2/170	2/28017	3.66023e-05	2	2	0.0405187	0.039498	0.029355	8.88568e-05	Odocoileus_009014, Odocoileus_021041
GO:0051050	BP	e	positive regulation of transport	2/170	2/28017	3.66023e-05	5	2	0.0405187	0.039498	0.029355	8.88568e-05	Odocoileus_009014, Odocoileus_010594
GO:0008033	BP	e	tRNA processing	2/170	2/28017	3.66023e-05	9	2	0.0405187	0.039498	0.029355	8.88568e-05	Odocoileus_009014, Odocoileus_010192
GO:0032886	BP	e	regulation of microtubule-based process	2/170	2/28017	3.66023e-05	4	2	0.0405187	0.039498	0.029355	8.88568e-05	Odocoileus_009014, Odocoileus_010525
GO:0051656	BP	e	establishment of organelle localization	2/170	2/28017	3.66023e-05	3	2	0.0405187	0.039498	0.029355	8.88568e-05	Odocoileus_009014, Odocoileus_021041
GO:0000027	BP	e	ribosomal large subunit assembly	2/170	2/28017	3.66023e-05	7	2	0.0405187	0.039498	0.029355	8.88568e-05	Odocoileus_006245, Odocoileus_022329
GO:0050906	BP	e	detection of stimulus involved in sensory perception	2/170	2/28017	3.66023e-05	3	2	0.0405187	0.039498	0.029355	8.88568e-05	Odocoileus_000127, Odocoileus_006245
GO:0036503	BP	e	ERAD pathway	2/170	2/28017	3.66023e-05	8	2	0.0405187	0.039498	0.029355	8.88568e-05	Odocoileus_000381, Odocoileus_022226
GO:0045597	BP	e	positive regulation of cell differentiation	2/170	2/28017	3.66023e-05	5	2	0.0405187	0.039498	0.029355	8.88568e-05	Odocoileus_010192, Odocoileus_019161
GO:0007507	BP	e	heart development	2/170	2/28017	3.66023e-05	4	2	0.0405187	0.039498	0.029355	8.88568e-05	Odocoileus_019161, Odocoileus_022329
GO:0022414	BP	e	reproductive process	2/170	2/28017	3.66023e-05	1	2	0.0405187	0.039498	0.029355	8.88568e-05	Odocoileus_000376, Odocoileus_021337
GO:0070085	BP	e	glycosylation	2/170	2/28017	3.66023e-05	2	2	0.0405187	0.039498	0.029355	8.88568e-05	Odocoileus_012471, Odocoileus_025446
GO:0010389	BP	e	regulation of G2/M transition of mitotic cell cycle	2/170	2/28017	3.66023e-05	8	2	0.0405187	0.039498	0.029355	8.88568e-05	Odocoileus_002352, Odocoileus_006475
GO:0099587	BP	e	inorganic ion import across plasma membrane	2/170	2/28017	3.66023e-05	6	2	0.0405187	0.039498	0.029355	8.88568e-05	Odocoileus_007504, Odocoileus_008154
GO:0003013	BP	e	circulatory system process	2/170	2/28017	3.66023e-05	3	2	0.0405187	0.039498	0.029355	8.88568e-05	Odocoileus_005218, Odocoileus_022329
GO:0007006	BP	e	mitochondrial membrane organization	2/170	2/28017	3.66023e-05	6	2	0.0405187	0.039498	0.029355	8.88568e-05	Odocoileus_000175, Odocoileus_006245
GO:0006163	BP	e	purine nucleotide metabolic process	2/170	2/28017	3.66023e-05	8	2	0.0405187	0.039498	0.029355	8.88568e-05	Odocoileus_010267, Odocoileus_022372
GO:0065004	BP	e	protein-DNA complex assembly	2/170	2/28017	3.66023e-05	6	2	0.0405187	0.039498	0.029355	8.88568e-05	Odocoileus_000569, Odocoileus_021337
GO:0051091	BP	e	positive regulation of DNA-binding transcription factor activity	2/170	2/28017	3.66023e-05	10	2	0.0405187	0.039498	0.029355	8.88568e-05	Odocoileus_006245, Odocoileus_010625
GO:0051249	BP	e	regulation of lymphocyte activation	2/170	2/28017	3.66023e-05	6	2	0.0405187	0.039498	0.029355	8.88568e-05	Odocoileus_010192, Odocoileus_010594
GO:0099537	BP	e	trans-synaptic signaling	2/170	2/28017	3.66023e-05	6	2	0.0405187	0.039498	0.029355	8.88568e-05	Odocoileus_021915, Odocoileus_022329
GO:0035725	BP	e	sodium ion transmembrane transport	2/170	2/28017	3.66023e-05	8	2	0.0405187	0.039498	0.029355	8.88568e-05	Odocoileus_007504, Odocoileus_020018
GO:0050863	BP	e	regulation of T cell activation	2/170	2/28017	3.66023e-05	7	2	0.0405187	0.039498	0.029355	8.88568e-05	Odocoileus_010192, Odocoileus_010594
GO:1902533	BP	e	positive regulation of intracellular signal transduction	2/170	2/28017	3.66023e-05	7	2	0.0405187	0.039498	0.029355	8.88568e-05	Odocoileus_000384, Odocoileus_001225
GO:0016477	BP	e	cell migration	2/170	2/28017	3.66023e-05	3	2	0.0405187	0.039498	0.029355	8.88568e-05	Odocoileus_010625, Odocoileus_019161
GO:0031175	BP	e	neuron projection development	2/170	2/28017	3.66023e-05	6	2	0.0405187	0.039498	0.029355	8.88568e-05	Odocoileus_010525, Odocoileus_019619
GO:0010506	BP	e	regulation of autophagy	2/170	2/28017	3.66023e-05	6	2	0.0405187	0.039498	0.029355	8.88568e-05	Odocoileus_000381, Odocoileus_000384
GO:0002253	BP	e	activation of immune response	2/170	2/28017	3.66023e-05	6	2	0.0405187	0.039498	0.029355	8.88568e-05	Odocoileus_009263, Odocoileus_022393
GO:0045944	BP	e	positive regulation of transcription by RNA polymerase II	2/170	2/28017	3.66023e-05	10	2	0.0405187	0.039498	0.029355	8.88568e-05	Odocoileus_006382, Odocoileus_020822
GO:0042127	BP	e	regulation of cell population proliferation	2/170	2/28017	3.66023e-05	4	2	0.0405187	0.039498	0.029355	8.88568e-05	Odocoileus_010192, Odocoileus_020590
GO:0015849	BP	e	organic acid transport	2/170	2/28017	3.66023e-05	5	2	0.0405187	0.039498	0.029355	8.88568e-05	Odocoileus_005251, Odocoileus_025491
GO:0048870	BP	e	cell motility	2/170	2/28017	3.66023e-05	2	2	0.0405187	0.039498	0.029355	8.88568e-05	Odocoileus_010625, Odocoileus_019161
GO:0006814	BP	e	sodium ion transport	2/170	2/28017	3.66023e-05	7	2	0.0405187	0.039498	0.029355	8.88568e-05	Odocoileus_007504, Odocoileus_020018
GO:0030029	BP	e	actin filament-based process	2/170	2/28017	3.66023e-05	2	2	0.0405187	0.039498	0.029355	8.88568e-05	Odocoileus_010804, Odocoileus_021041
GO:0007007	BP	e	inner mitochondrial membrane organization	2/170	2/28017	3.66023e-05	7	2	0.0405187	0.039498	0.029355	8.88568e-05	Odocoileus_000175, Odocoileus_006245
GO:0032446	BP	e	protein modification by small protein conjugation	2/170	2/28017	3.66023e-05	8	2	0.0405187	0.039498	0.029355	8.88568e-05	Odocoileus_007894, Odocoileus_013880
GO:0051606	BP	e	detection of stimulus	2/170	2/28017	3.66023e-05	2	2	0.0405187	0.039498	0.029355	8.88568e-05	Odocoileus_000127, Odocoileus_006245
GO:0006644	BP	e	phospholipid metabolic process	2/170	2/28017	3.66023e-05	5	2	0.0405187	0.039498	0.029355	8.88568e-05	Odocoileus_006245, Odocoileus_010625
GO:0098657	BP	e	import into cell	2/170	2/28017	3.66023e-05	4	2	0.0405187	0.039498	0.029355	8.88568e-05	Odocoileus_007504, Odocoileus_008154
GO:0051094	BP	e	positive regulation of developmental process	2/170	2/28017	3.66023e-05	4	2	0.0405187	0.039498	0.029355	8.88568e-05	Odocoileus_010192, Odocoileus_019161
GO:0009896	BP	e	positive regulation of catabolic process	2/170	2/28017	3.66023e-05	5	2	0.0405187	0.039498	0.029355	8.88568e-05	Odocoileus_010192, Odocoileus_010732
GO:0007264	BP	e	small GTPase mediated signal transduction	2/170	2/28017	3.66023e-05	6	2	0.0405187	0.039498	0.029355	8.88568e-05	Odocoileus_002255, Odocoileus_009101
GO:0098739	BP	e	import across plasma membrane	2/170	2/28017	3.66023e-05	5	2	0.0405187	0.039498	0.029355	8.88568e-05	Odocoileus_007504, Odocoileus_008154
GO:0051174	BP	e	regulation of phosphorus metabolic process	2/170	2/28017	3.66023e-05	5	2	0.0405187	0.039498	0.029355	8.88568e-05	Odocoileus_006488, Odocoileus_021592
GO:0006400	BP	e	tRNA modification	2/170	2/28017	3.66023e-05	10	2	0.0405187	0.039498	0.029355	8.88568e-05	Odocoileus_009014, Odocoileus_010192
GO:0002694	BP	e	regulation of leukocyte activation	2/170	2/28017	3.66023e-05	5	2	0.0405187	0.039498	0.029355	8.88568e-05	Odocoileus_010192, Odocoileus_010594
GO:0006939	BP	e	smooth muscle contraction	2/170	2/28017	3.66023e-05	5	2	0.0405187	0.039498	0.029355	8.88568e-05	Odocoileus_006245, Odocoileus_022329
GO:0007189	BP	e	adenylate cyclase-activating G protein-coupled receptor signaling pathway	2/170	2/28017	3.66023e-05	7	2	0.0405187	0.039498	0.029355	8.88568e-05	Odocoileus_006245, Odocoileus_009263
GO:0033365	BP	e	protein localization to organelle	2/170	2/28017	3.66023e-05	5	2	0.0405187	0.039498	0.029355	8.88568e-05	Odocoileus_010702, Odocoileus_019441
GO:0002831	BP	e	regulation of response to biotic stimulus	2/170	2/28017	3.66023e-05	4	2	0.0405187	0.039498	0.029355	8.88568e-05	Odocoileus_009263, Odocoileus_010267
GO:0006541	BP	e	glutamine metabolic process	2/170	2/28017	3.66023e-05	9	2	0.0405187	0.039498	0.029355	8.88568e-05	Odocoileus_022144, Odocoileus_023391
GO:0045732	BP	e	positive regulation of protein catabolic process	2/170	2/28017	3.66023e-05	7	2	0.0405187	0.039498	0.029355	8.88568e-05	Odocoileus_010192, Odocoileus_010732
GO:0050727	BP	e	regulation of inflammatory response	2/170	2/28017	3.66023e-05	6	2	0.0405187	0.039498	0.029355	8.88568e-05	Odocoileus_010192, Odocoileus_012086
GO:0009719	BP	e	response to endogenous stimulus	2/170	2/28017	3.66023e-05	2	2	0.0405187	0.039498	0.029355	8.88568e-05	Odocoileus_000384, Odocoileus_025827
GO:0080135	BP	e	regulation of cellular response to stress	2/170	2/28017	3.66023e-05	5	2	0.0405187	0.039498	0.029355	8.88568e-05	Odocoileus_012467, Odocoileus_014765
GO:0072521	BP	e	purine-containing compound metabolic process	2/170	2/28017	3.66023e-05	4	2	0.0405187	0.039498	0.029355	8.88568e-05	Odocoileus_010267, Odocoileus_022372
GO:0072594	BP	e	establishment of protein localization to organelle	2/170	2/28017	3.66023e-05	6	2	0.0405187	0.039498	0.029355	8.88568e-05	Odocoileus_010702, Odocoileus_019441
GO:1901361	BP	e	organic cyclic compound catabolic process	2/170	2/28017	3.66023e-05	4	2	0.0405187	0.039498	0.029355	8.88568e-05	Odocoileus_003128, Odocoileus_010267
GO:0044270	BP	e	cellular nitrogen compound catabolic process	2/170	2/28017	3.66023e-05	4	2	0.0405187	0.039498	0.029355	8.88568e-05	Odocoileus_003128, Odocoileus_010267
GO:0007010	BP	e	cytoskeleton organization	2/170	2/28017	3.66023e-05	5	2	0.0405187	0.039498	0.029355	8.88568e-05	Odocoileus_010525, Odocoileus_010804
GO:0019439	BP	e	aromatic compound catabolic process	2/170	2/28017	3.66023e-05	4	2	0.0405187	0.039498	0.029355	8.88568e-05	Odocoileus_003128, Odocoileus_010267
GO:0050804	BP	e	modulation of chemical synaptic transmission	2/170	2/28017	3.66023e-05	6	2	0.0405187	0.039498	0.029355	8.88568e-05	Odocoileus_003349, Odocoileus_006245
GO:0009064	BP	e	glutamine family amino acid metabolic process	2/170	2/28017	3.66023e-05	8	2	0.0405187	0.039498	0.029355	8.88568e-05	Odocoileus_022144, Odocoileus_023391
GO:0071417	BP	e	cellular response to organonitrogen compound	2/170	2/28017	3.66023e-05	5	2	0.0405187	0.039498	0.029355	8.88568e-05	Odocoileus_000384, Odocoileus_025827
GO:0006954	BP	e	inflammatory response	2/170	2/28017	3.66023e-05	4	2	0.0405187	0.039498	0.029355	8.88568e-05	Odocoileus_006245, Odocoileus_010192
GO:0051090	BP	e	regulation of DNA-binding transcription factor activity	2/170	2/28017	3.66023e-05	9	2	0.0405187	0.039498	0.029355	8.88568e-05	Odocoileus_006245, Odocoileus_010625
GO:0007059	BP	e	chromosome segregation	2/170	2/28017	3.66023e-05	3	2	0.0405187	0.039498	0.029355	8.88568e-05	Odocoileus_009014, Odocoileus_019829
GO:0030705	BP	e	cytoskeleton-dependent intracellular transport	2/170	2/28017	3.66023e-05	5	2	0.0405187	0.039498	0.029355	8.88568e-05	Odocoileus_009014, Odocoileus_021041
GO:1901990	BP	e	regulation of mitotic cell cycle phase transition	2/170	2/28017	3.66023e-05	7	2	0.0405187	0.039498	0.029355	8.88568e-05	Odocoileus_002352, Odocoileus_006475
GO:0044774	BP	e	mitotic DNA integrity checkpoint signaling	2/170	2/28017	3.66023e-05	10	2	0.0405187	0.039498	0.029355	8.88568e-05	Odocoileus_002352, Odocoileus_006475
GO:0034655	BP	e	nucleobase-containing compound catabolic process	2/170	2/28017	3.66023e-05	5	2	0.0405187	0.039498	0.029355	8.88568e-05	Odocoileus_003128, Odocoileus_010267
GO:0034982	BP	e	mitochondrial protein processing	2/170	2/28017	3.66023e-05	7	2	0.0405187	0.039498	0.029355	8.88568e-05	Odocoileus_002286, Odocoileus_010625
GO:0046942	BP	e	carboxylic acid transport	2/170	2/28017	3.66023e-05	6	2	0.0405187	0.039498	0.029355	8.88568e-05	Odocoileus_005251, Odocoileus_025491
GO:0006874	BP	e	intracellular calcium ion homeostasis	2/170	2/28017	3.66023e-05	6	2	0.0405187	0.039498	0.029355	8.88568e-05	Odocoileus_001290, Odocoileus_007878
GO:0032386	BP	e	regulation of intracellular transport	2/170	2/28017	3.66023e-05	5	2	0.0405187	0.039498	0.029355	8.88568e-05	Odocoileus_000455, Odocoileus_009014
GO:0098916	BP	e	anterograde trans-synaptic signaling	2/170	2/28017	3.66023e-05	7	2	0.0405187	0.039498	0.029355	8.88568e-05	Odocoileus_021915, Odocoileus_022329
GO:0019318	BP	e	hexose metabolic process	2/170	2/28017	3.66023e-05	5	2	0.0405187	0.039498	0.029355	8.88568e-05	Odocoileus_006245, Odocoileus_024966
GO:1902532	BP	e	negative regulation of intracellular signal transduction	2/170	2/28017	3.66023e-05	7	2	0.0405187	0.039498	0.029355	8.88568e-05	Odocoileus_005753, Odocoileus_014765
GO:0050778	BP	e	positive regulation of immune response	2/170	2/28017	3.66023e-05	5	2	0.0405187	0.039498	0.029355	8.88568e-05	Odocoileus_009263, Odocoileus_022393
GO:0042176	BP	e	regulation of protein catabolic process	2/170	2/28017	3.66023e-05	6	2	0.0405187	0.039498	0.029355	8.88568e-05	Odocoileus_010192, Odocoileus_010732
GO:0007399	BP	e	nervous system development	2/170	2/28017	3.66023e-05	4	2	0.0405187	0.039498	0.029355	8.88568e-05	Odocoileus_006245, Odocoileus_025134
GO:0045088	BP	e	regulation of innate immune response	2/170	2/28017	3.66023e-05	6	2	0.0405187	0.039498	0.029355	8.88568e-05	Odocoileus_009263, Odocoileus_010267
GO:0006281	BP	e	DNA repair	2/170	2/28017	3.66023e-05	7	2	0.0405187	0.039498	0.029355	8.88568e-05	Odocoileus_008665, Odocoileus_021337
GO:0033108	BP	e	mitochondrial respiratory chain complex assembly	2/170	2/28017	3.66023e-05	6	2	0.0405187	0.039498	0.029355	8.88568e-05	Odocoileus_007509, Odocoileus_010625
GO:0043549	BP	e	regulation of kinase activity	2/170	2/28017	3.66023e-05	8	2	0.0405187	0.039498	0.029355	8.88568e-05	Odocoileus_006488, Odocoileus_021592
GO:0050865	BP	e	regulation of cell activation	2/170	2/28017	3.66023e-05	4	2	0.0405187	0.039498	0.029355	8.88568e-05	Odocoileus_010192, Odocoileus_010594
GO:0000041	BP	e	transition metal ion transport	2/170	2/28017	3.66023e-05	7	2	0.0405187	0.039498	0.029355	8.88568e-05	Odocoileus_007878, Odocoileus_007907
